# **Vps501, a novel vacuolar SNX-BAR protein cooperates with the SEA complex to induce autophagy**

Shreya Goyal<sup>1</sup>, Verónica A. Segarra<sup>2</sup>, Nitika<sup>1</sup>, Aaron M. Stetcher<sup>1</sup>, Andrew W. Truman<sup>1</sup>, Adam M. Reitzel<sup>1</sup>, and Richard J. Chi<sup>1\*</sup>

<sup>1</sup>Department of Biological Sciences, University of North Carolina, Charlotte, USA 28223

<sup>2</sup>Department of Biology, High Point University, High Point, NC, USA 27268

\* Address correspondence

Richard J. Chi  
Department of Biological Sciences  
University of North Carolina at Charlotte  
Charlotte, North Carolina 28223

Tel: 704-687-8697

FAX: 704-687-1488

e-mail: [richard.chi@uncc.edu](mailto:richard.chi@uncc.edu)

**Running Title:** Vps501, a novel vacuolar yeast SNX-BAR protein

**Keywords:** SNX-BAR, retromer, TORC1, autophagy, SEA complex, Atg27

## 27 **Abstract**

28 The sorting nexins (SNX), constitute a diverse family of molecules that play varied roles in  
 29 membrane trafficking, cell signaling, membrane remodeling, organelle motility and autophagy. In  
 30 particular, the SNX-BAR proteins, a SNX subfamily characterized by a C-terminal dimeric  
 31 Bin/Amphiphysin/Rvs (BAR) lipid curvature domain and a conserved Phox-homology domain, are  
 32 of great interest. In budding yeast, many SNX-BARs proteins have well-characterized endo-  
 33 vacuolar trafficking roles. Phylogenetic analyses allowed us to identify an additional SNX-BAR  
 34 protein, Vps501, with a novel endo-vacuolar role. We report that Vps501 uniquely localizes to the  
 35 vacuolar membrane and works with the SEA complex to regulate autophagy. Furthermore, we  
 36 found cells displayed a severe deficiency in starvation-induced/nonselective autophagy only when  
 37 SEA complex subunits are ablated in combination with Vps501, indicating a cooperative role with  
 38 the SEA complex during autophagy. Additionally, we found the SEA complex becomes  
 39 destabilized in *vps501Δsea1Δ* cells, which resulted in aberrant TORC1 hyperactivity and  
 40 misregulation of autophagy induction.

41

## 42 Introduction

43 The sorting nexin (SNX) family is an evolutionarily conserved class of cellular trafficking proteins  
 44 that are most well-known for their ability to bind phospholipids to catalyze endosomal sorting  
 45 reactions and other membrane trafficking pathways in the cell (Chi et al., 2015; Gallon and Cullen,  
 46 2015). SNX proteins are structurally characterized by an evolutionarily conserved region known  
 47 as the Phox (PX) homology domain, which allows them to recognize the lipid composition of the  
 48 endosome, most notably phosphatidylinositol-3-phosphate (PI3P) (Teasdale and Collins, 2012).  
 49 While all PX domains have similar core folds, consisting of three antiparallel  $\beta$ -strands and three  
 50  $\alpha$ -helices that extend a canonical PI3P binding motif  $\psi PxxPxK$  ( $\psi$ =large aliphatic amino acid),  
 51 outside this region, they have relatively low sequence homology. A recent analysis of over 39 PX  
 52 domains identified a secondary His/Tyr- containing binding motif present in a subset of PX domain  
 53 proteins which may explain the lipid promiscuity of some sorting nexins (Chandra et al., 2019).  
 54 However, the range of different phosphoinositides that associate with PX domains, and the  
 55 significance of these interactions for cellular localization are still unclear. Moreover, SNX proteins  
 56 are divided into subfamilies according to the presence of other characteristic domains such as a  
 57 Bin-Amphiphysin-Rvs (BAR) domain (van Weering et al., 2010). BAR domains allow members of  
 58 the SNX-BAR subfamily to bind high positive curvature structures, driving the formation of  
 59 endosomal tubules, while also conferring the ability to form sorting complexes that facilitate cargo  
 60 selection (Chi et al., 2014; van Weering et al., 2012; van Weering et al., 2010). The  
 61 *Saccharomyces cerevisiae* genome encodes seven annotated SNX-BAR proteins, while the  
 62 human genome encodes twelve (Anton et al., 2020; Teasdale and Collins, 2012; van Weering et  
 63 al., 2010). In addition to working with complexes such as retromer to mediate retrograde and  
 64 recycling trafficking of cargos at the tubular endosomal network (TEN) (Burd and Cullen, 2014;  
 65 Chi et al., 2014; Teasdale and Collins, 2012; van Weering et al., 2012; van Weering et al., 2010),  
 66 SNX-BAR proteins contribute to other important conserved cellular processes such as

67 macroautophagy (herein referred to as autophagy) and selective autophagy (Ma et al., 2017; Ma  
68 et al., 2018; Nemec et al., 2017).

69 Autophagy is a stress response in which eukaryotic cells recycle damaged or unneeded  
70 components by sequestering them in double-bilayered compartments called autophagosomes.  
71 Once made, autophagosomes deliver their contents for breakdown by docking and fusing with  
72 the cell's degradative organelle, the lysosome in animal cells or the vacuole in plant and yeast  
73 cells. These key steps and the core autophagy-related (Atg) proteins that mediate and regulate  
74 them are evolutionarily conserved across all autophagy pathways, including starvation-induced  
75 bulk autophagy and cargo-selective autophagy pathways (Goyal et al., 2020; Nakatogawa, 2020;  
76 Su et al., 2015; Yang and Klionsky, 2010). While vacuoles and lysosomes can serve as storage  
77 and/or recycling depots for cells, their delimiting membranes host critical signaling events for  
78 autophagy induction such as the inactivation of *target of rapamycin* (TOR). Multiprotein  
79 complexes such as TORC1 in yeast are tethered to the vacuole membrane and function by  
80 integrating signals from many intracellular and extracellular cues from a variety of kinases,  
81 GTPases and their effectors (Binda et al., 2009). Recently, an upstream regulator of the TORC1,  
82 the yeast SEA complex (GATOR complex in humans), was identified and shown to be part of this  
83 web of GTPase effectors (Algret et al., 2014; Panchaud et al., 2013). The SEA complex is a  
84 conserved eight protein complex (Sea1, Sea2, Sea3, Sea4, Seh1, Sec13, Npr2, Npr3) made up  
85 of proteins with structural characteristics similar to the membrane coating complexes such as the  
86 nuclear pore complex, the COPII vesicle coating complex and HOPS/CORVET tethering  
87 complexes (Dokudovskaya and Rout, 2015). The SEA complex is also dynamically associated to  
88 the vacuole membrane; however, its complete function is not well understood.

89 Substantial effort has gone into understanding the membrane trafficking events required to form  
90 autophagosomes and the contributions of SNX-BAR proteins to the autophagy pathway. In fact,

91 SNX-BAR proteins have been shown to mediate an emerging number of autophagy-related  
 92 processes. For example, the Snx4-Snx41 SNX-BAR heterodimer mediates the retrograde  
 93 endosome-to-Golgi transport of the autophagy-related protein Atg27, an integral membrane  
 94 protein that when deleted leads to decreased autophagosome number and autophagic flux in  
 95 budding yeast (Ma et al., 2017; Yen et al., 2007). Moreover, Snx4-mediated retrograde trafficking  
 96 of proteins and lipids helps the cell maintain the phosphatidylserine (PS) and  
 97 phosphatidylethanolamine (PE) homeostasis, which is required to allow autophagosome fusion  
 98 with the vacuole, one of the final stages of autophagy (Ma et al., 2018). As we come to understand  
 99 the full range of SNX-BAR protein functions, it is becoming clear that this group of proteins has a  
 100 critical role in the network of cellular players that collectively regulate autophagy.

101 In this study, we report the identification of a novel yeast SNX-BAR protein, encoded by yeast  
 102 open reading frame (ORF) YKR078W, that contributes to autophagy induction alongside the  
 103 SEA complex. Our findings bring us to a more complete understanding of SNX-BAR family of  
 104 proteins and the important role they play in autophagy regulation.

105

# Results

## ***YKR078W/VPS501 and VPS5 are phylogenetically related but functionally distinct***

Phylogenetic analysis of the SNX-BAR sorting nexins allowed us to identify ORF YKR078W from *Saccharomyces cerevisiae* as a SNX-BAR candidate that forms a well-supported clade (bootstrap = 99) with Vps5 proteins from *S. cerevisiae* and other closely related species from the family Saccharomycetaceae (Figure 1A, Supplemental Figure 1). As previously shown by Koumandou et al. (2011), fungal Vps5 proteins are most closely related to SNX1/2 proteins from animals and choanoflagellates (Koumandou et al., 2011). The simplest explanation for the existence of two Vps5-like proteins in *S. cerevisiae* is a recent gene duplication event. To assess whether or not there is functional overlap between the Vps5 and YKR078W proteins, we used *YKR078WΔ* yeast cells to examine the localization of the vacuolar hydrolase receptor Vps10. This receptor is trafficked from the prevacuolar endosome to Golgi by the Vps5-dependent retromer-SNX-BAR complex and is mistrafficked to the vacuole in *vps5Δ* cells (Horazdovsky et al., 1997; Nothwehr and Hinds, 1997; Seaman et al., 1997). We hypothesized that, if there is functional overlap between the Vps5 and YKR078W proteins, Vps10 mislocalization in *YKR078WΔ* would phenocopy the *vps5Δ* mutant. However, deletion of YKR078W did not affect Vps10 localization (Figure 1B), indicating that while Vps5 and YKR078W are phylogenetically related, they are functionally different. In light of these findings, we gave YKR078W the distinct, but Vps5-related name of Vps501. We will use the Vps501 annotation throughout the remainder of this paper.

## ***N-terminally tagged Vps501 localizes to the vacuolar membrane***

While Vps501 shares common evolutionary ancestors and lineage with Vps5, its function within the cell has so far remained uncharacterized. Multiple genome-wide localization screens using C-terminally fused GFP failed to detect expression and/or failed to localize Vps501 to any intracellular compartment (Huh et al., 2003). Interestingly, we have discovered that Vps501

appears to be nonfunctional as a C-terminal GFP fusion (data not shown). However, a fully integrated N-terminal GFP fusion appeared to preserve the functionality and localization of Vps501. Instead of an endosomal localization, which might be expected based on its homology to Vps5, we detect the protein predominantly on the limiting membrane of the vacuole, and in a few intracellular puncta (Figure 1C, upper panels). This localization pattern remains consistent when Vps501 is chromosomally tagged under the control of either its endogenous promoter (Figure 1C, upper panels) or a constitutive TDH3/GPD promoter (Figure 1C, lower panels), and when expressed from an extrachromosomal plasmid (Figure 1C, middle, panels).

### ***Identification of Vps501 interactors***

To gain insights into Vps501 function, we used a co-immunoprecipitation mass spectrometry approach to identify its interactors. We purified GFP-Vps501 complexes and characterized the Vps501 interactome using mass spectrometry (Figure 2A). The list of Vps501 interacting proteins was enriched for proteins involved in amino acid/carbohydrate metabolism, protein translation, protein folding, and endocytosis (Supplemental Table 1). Our analysis of strong interactors of Vps501 identified subunits of the evolutionarily conserved eight-protein SEA complex (Sea1, Seh1) and the TORC1 subunit Kog1, each of which resides on the vacuole membrane and is linked with autophagy through regulation of TORC1 signaling (Figure 2B). To confirm a spatial relationship between Vps501 and the vacuolar interactors, we tested the ability of Vps501 to colocalize with Sea1, Seh1 and Kog1. Our results indicate that Vps501 colocalizes with each vacuolar interactor at the vacuolar membrane (Figure 2C).

### ***Vps501-Sea1 interaction stabilizes the SEA Complex and is important for Vps501 vacuolar membrane localization***

Due to Vps501's unique vacuolar localization and apparent interactions with vacuolar proteins, we hypothesized that direct recruitment via the SEA complex is critical for Vps501 vacuolar

localization. Indeed, we found that ablation of Sea1 causes mislocalization of GFP-Vps501 to the cytoplasm (Figure 3). Interestingly, deletion of any other SEA complex subunit failed to trigger mislocalization of GFP-Vps501 from the vacuole, suggesting that a interaction with Sea1 specifically mediates Vps501 recruitment to the vacuolar membrane. Among the other Vps501-interacting proteins, we found that the SEACIT subunits Npr2 and Npr3 are dramatically mislocalized to the vacuolar lumen (VL) in 85% of *vps501Δsea1Δ* cells (Figure 4 A-B). While the SEACAT subunits Sea2, Sea3, Sea4 were also mislocalized to the VL in 100% of *vps501Δsea1Δ* cells, this defect was masked by the 80-90% mislocalization observed in the *sea1Δ* single mutant (Supplemental Figure 2). The remaining SEACAT subunits Seh1 and Sec13 were significantly mislocalized from the vacuolar membrane to non-vacuolar compartments in both *sea1Δ* and *vps501Δsea1Δ* cells, but were not found in the vacuole lumen. Seh1 and Sec13 have previously reported roles in the nucleus and ER, respectively, and likely become enriched at these locations when vacuole membrane localization is compromised (Supplemental Figure 2) (Dokudovskaya et al., 2011). Collectively, these results indicate that Vps501 works with Sea1 to stabilize the localization of the SEA complex at the vacuolar membrane, possibly as a part of a larger mechanism that regulates TORC1 signaling.

### ***Vps501 contributes to the regulation of autophagy by the SEA complex***

We next performed a series of genetic and functional studies to interrogate the potential link between the *VPS501* gene and TORC1 signaling and to determine whether it is epistatic to any of the genes encoding the subunits of the SEA complex. TORC1 signaling can trigger autophagy induction, and we initially used fluorescence microscopy to assess localization of the canonical autophagy marker GFP-Atg8 in strains deleted for *VPS501* singly or in combination with different SEA complex subunits (Figure 5A). GFP-Atg8 processing was also monitored by immunoblotting to detect increases in both total GFP-Atg8 signal and ratio of free GFP to total GFP signal over



time (Figure 5B, C). Collectively, these assays allowed us to evaluate whether deletion of *VPS501* results in autophagic flux defects or exacerbates those caused by SEA complex mutants. We found that cells lacking Vps501 display no defects in starvation-induced (nonselective) autophagy, unless combined with deletions of SEACIT subunits. Interestingly, both fluorescence microscopy and immunoblot analysis of *sea1Δvps501Δ* cells showed a striking loss of autophagic flux in GFP-Atg8, indicating that Vps501 and the SEA complex work synergistically during autophagy (Figure 5). Others groups have reported kinetic delays in autophagic flux following deletion of *SEA1*, either alone or in combination with deletion of other SEA complex subunits (Algret et al., 2014). We found that combined loss of *VPS501* and *SEA1* severely impairs autophagy, nearly approximating the complete loss observed in the *atg1Δ* control. It is also worth noting that, as reported in previous studies, *NPR2* and *NPR3* deletions cause significant defects in both bulk and specific forms of autophagy, likely masking any synthetic defect present in *vps501Δ* mutant cells (Dokudovskaya and Rout, 2011). *VPS501* deletion in combination with each of the SEACAT subunits results in a partial reduction in autophagic flux as evidenced by GFP-Atg8 processing defects, with the most significant defect occurring in *seh1Δvps501Δ* cells (Supplemental Figure 3). Given the strong autophagic defects associated with the combined loss of *VPS501* and SEA complex subunits, particularly those of the SEACIT subcomplex, we set out to further examine the role of Vps501 vacuolar membrane localization in autophagy function.

### ***Vps501 contains a non-canonical PX domain that is required for its vacuolar membrane localization and function in autophagy***

We next aimed to determine whether the vacuolar membrane localization of Vps501 is required for its autophagic function. In order to generate a mutant Vps501 protein that is unable to localize to the vacuolar membrane, we sought to first identify the domain responsible for this localization. We began by examining the lipid-binding PX domain that might mediate this localization through

recognition of the specific lipid composition. Although the canonical lipid-binding motif in the PX domain of Vps501 is missing key motif residues that would be required for PI3P lipid binding, we discovered a predicted secondary noncanonical binding motif (Figure 6A). We used site-directed mutagenesis of the pGFP-Vps501 plasmid to disrupt the noncanonical lipid binding motif in order to determine its effect on localization of Vps501 to the vacuole. We substituted alanine for the key conserved tyrosine and lysine residues in the noncanonical lipid binding motif of Vps501, generating a mutant protein referred to here as GFP-Vps501<sup>YKAA</sup>. Colocalization studies of pGFP-Vps501<sup>YKAA</sup> and the vacuolar membrane marker FM4-64, indicated that GFP-Vps501<sup>YKAA</sup> recruitment to the vacuolar membrane is reduced by 70% relative to the GFP-Vps501 control (Figure 6B, D upper graph). This 70% reduction in the vacuolar membrane recruitment of pGFP-Vps501<sup>YKAA</sup> was seen in both *vps501Δ* and *sea1Δ* cells, and combination of pGFP-Vps501<sup>YKAA</sup> with *vps501Δsea1Δ* led to a near total loss of Vps501 vacuolar localization (Figure 6B, D upper graph). This indicated that both protein-protein interaction with Sea1 and lipid recognition by the lipid-binding motif are important for Vps501 localization to the vacuolar membrane (Figure 6B, D upper graph). We next ectopically expressed *VPS501*<sup>YKAA</sup> from a 2-micron plasmid and found that the mutant fails to complement *vps501Δsea1Δ* cells in GFP-Atg8 processing assays (Figure 6C). Taken together with the severe defect in *sea1Δ* cell autophagic flux associated with the *VPS501*<sup>YKAA</sup> mutant relative to the wild-type control (Figure 6D, upper graph), the combination of Sea1 interaction and lipid-binding appears to be required not only for Vps501 recruitment to the vacuolar membrane but also for its role in autophagy.

### ***Vps501 and Sea1 regulate Atg27 trafficking to the vacuolar membrane***

To further assess the functions of Vps501 in autophagy and regulation of endosomal cargo trafficking, we examined the effects of Vps501 and SEA complex mutations, singly and in combination, on Atg27 localization to the vacuolar membrane. Atg27 is an autophagy-related

transmembrane protein and was chosen for investigation as a potential mechanistic link because of its characterized vacuolar-endosomal trafficking itinerary (Segarra et al., 2015). In wild-type cells, Atg27-2XGFP cycles between the vacuolar membrane, Golgi/endosome and autophagic compartments. In *vps501Δsea1Δ* cells, we found that Atg27-2XGFP is significantly depleted from the vacuolar membrane, indicating that Vps501-Sea1 is responsible for maintaining Atg27 at the vacuolar membrane (Figure 7A-B). However, it is not yet clear whether this mechanism is mediated by a direct or indirect interaction with Vps501 and the SEA complex.

### ***The TORC1 complex and induction of autophagy are defective in *vps501Δsea1Δ* cells***

While other sorting nexins have previously been found to contribute to autophagy indirectly by mobilizing lipid membranes for autophagosome biogenesis or potentiating vacuolar fusion, the role of Vps501 in autophagy appears to be more direct (Dong et al., 2021; Hanley et al., 2021; Henkel et al., 2020; Ma et al., 2018). The clear physical and genetic interactions of Vps501 with the SEA complex indicate a potential role in regulating TORC1 signaling, possibly during the induction of autophagy. To test this hypothesis, we targeted subunits of TORC1 to determine whether they were defective in *vps501Δsea1Δ* cells. We were particularly interested in the Kog1 subunit, as it was one of our most abundant hits in the proteomics screen for Vps501 interactors (Figure 2). Similar to what others have found, we localized Kog1-2XGFP to two independent TORC1 pools; one around the vacuolar membrane and a second in dot-like perivacuolar structures (Chen et al., 2021; Hatakeyama et al., 2019)(Figure 8A). This dual localization is consistently present in wildtype, *vps501Δ* or *sea1Δ* cells. Interestingly, the dot-like perivacuolar structures exhibit enhanced accumulation in *vps501Δsea1Δ* cells, with the average number of Kog1-2XGFP dots enriched 2-fold relative to the wildtype or single mutant controls. The vacuolar Kog1-2XGFP pool appears to be reduced, either in the presence or absence of nitrogen (Figure 8A-B). Recently, these dot-like TORC1 structures have been referred to as signaling endosomes and

have been shown to have unique phosphorylation targets (Chen et al., 2021; Hatakeyama et al., 2019). One such target is Atg13, a regulatory subunit of the Atg1 signaling complex that is required for induction of autophagy (Kamada et al., 2000). When TORC1 is active, Atg13 is phosphorylated, inhibiting induction of autophagy. Therefore, we hypothesized that Atg13 phosphorylation would be defective in *vps501Δsea1Δ* cells if autophagy induction were impaired. We analyzed Atg13 by immunoblotting in wildtype and mutant cells, both before and after nitrogen starvation, and quantified the resulting signals. In wildtype, *vps501Δ* or *sea1Δ* cells, the majority of Atg13 is phosphorylated as indicated by an enrichment of the upper Atg13 band (labeled Atg13P) during vegetative growth, indicating that TORC1 is active (Figure 8C-D). Autophagy-inducing conditions inactivate TORC1, and the enrichment of the lower band (labeled Atg13) in wildtype, *vps501Δ*, or *sea1Δ* cells indicates that the majority of Atg13 is not phosphorylated (Figure 8C-D). In contrast, Atg13 appears only phosphorylated in *vps501Δ sea1Δ* cells, regardless of nitrogen starvation, indicating that autophagy induction is defective in these mutants, (Figure 8C-D). Taken together, these results indicate that Vps501 cooperates with the SEA complex to regulate TORC1 signaling during the induction of autophagy.

## Discussion

In this study, we report the identification of a novel vacuolar membrane SNX-BAR protein, Vps501. While phylogenetically, Vps501 is most related to Vps5, an essential component of the yeast retromer complex, protein sequence analysis shows residue variations acquired during its divergence (Figure 1, Supplemental Figure 1). In this study, we demonstrate how divergence from Vps501 and Vps5 has resulted in unique differences in function. For example, current models indicate that an evolutionarily conserved Phox-homology (PX) domain, a feature common in all sorting nexins, binds specifically to PI3P, the major phospholipid of the endosome. However, Vps501 has no canonical PI3P binding motif, as it is missing key motif residues. Instead, Vps501

275 has a secondary site that is likely solely responsible for lipid binding. Also, Vps501 exclusively  
 276 resides on the vacuolar membrane, a unique feature amongst the SNX-BAR protein family. We  
 277 speculate Vps501 likely possesses lipid specificity beyond PI3P as was discovered in other  
 278 sorting nexins (Chandra et al., 2019). This notion was supported by the Vps501<sup>YKAA</sup> mutant  
 279 mislocalizing to the cytosol, leaving only a small percentage remaining on the vacuolar membrane  
 280 (Figure 6). Interestingly, in *sea1Δ vps501<sup>YKAA</sup>* cells, the cytoplasmic mislocalization of the  
 281 Vps501<sup>YKAA</sup> mutant was completely blocked from the vacuolar membrane, suggesting Vps501  
 282 localization requires both the vacuolar membrane lipid composition and resident vacuolar proteins.  
 283 Whether these two binding requirements are universal or specialized to each SNX-BAR protein  
 284 is not known. However other SNX-BAR proteins such as Mvp1, an endosomal SNX-BAR, was  
 285 recently found to tetramerize and dissociate in order to bind membrane, indicating a selective  
 286 combination of protein-protein interaction regulation and lipid specificity likely determine the  
 287 function of each SNX-BAR (Sun et al., 2020). Understanding the novel ways in which Vps501  
 288 appears to recognize vacuolar lipid will be critical to understanding its function and regulation.

289 Multiple lines of evidence support a role for Vps501 in TORC1 signaling during autophagy  
 290 induction. Firstly, using a co-immunoprecipitation mass spectrometry approach, we identified  
 291 subunits of the evolutionary conserved SEA complex (Sea1, Seh1) and TORC1 subunit Kog1  
 292 (Figure 2-3). Each of these identified proteins resides on the vacuolar membrane and colocalizes  
 293 with Vps501. Furthermore, Sea1 was found to be critical for Vps501 localization, while the SEA  
 294 complex was destabilized in *vps501Δ sea1Δ* cells, indicating a direct interaction (Figure 3,  
 295 Supplemental Figure 2). It is also worth noting that the previous studies in which mass  
 296 spectrometry-based proteomics were used to discover the eight components of the SEA complex  
 297 all utilized an individual band excision-based proteomic approach focusing on the most enriched  
 298 bands (Dokudovskaya and Rout, 2011). This design excluded low abundant or low affinity  
 299 interactions and may account for why Vps501 was not detected in their screens.

Secondly, we found that Vps501 works together with the SEA complex to mediate GFP-Atg8 autophagic flux. We found that cells lacking Vps501 display a severe deficiency in autophagy only when SEA complex subunits were deleted as well (Figure 5, Supplemental Figure 3). A recent study came to similar conclusions, showing that loss of Sea2, Sea3 or Sea4 did not trigger major defects unless combined with *sea1* $\Delta$  (Algret et al., 2014; Dokudovskaya and Rout, 2011; Dokudovskaya et al., 2011). This led us to believe that Vps501 and the SEA complex cooperate within a synergistic pathway during autophagy induction. Furthermore, the complete impairment of autophagic flux in *vps501<sup>YKAA</sup>* cells suggests that a negative mutation within the vacuolar membrane recognition site of Vps501 is sufficient to drive impairment of the SEA complex.

Lastly, we have defined the role of Vps501 as a co-regulator of autophagy that promotes SEACIT inhibition of TORC1 during autophagy induction. The yeast Rag GTPase-TORC1 complex is found in two spatially and functionally distinct pools, on both the vacuolar and endosomal membranes (Chen et al., 2021; Hatakeyama et al., 2019). Vacuolar TORC1 promotes protein synthesis through its proximal effector Sch9, while endosomal TORC1 controls autophagy induction through phosphorylation of Atg13, preventing Atg1 complex formation at the pre-autophagosomal structure. Interestingly, *vps501* $\Delta*sea1* $\Delta$  cells show depletion of the Kog1-2XGFP subunit of TORC1 from the vacuolar membrane and enrichment in dot-like structures by nearly 2-fold (Figure 8). Likewise, the endosome-specific TORC1 substrate Atg13 is hyperphosphorylated in *vps501* $\Delta$  *sea1* $\Delta$  cells (Figure 8). This confirms that Vps501 function is specific to the vacuolar pool of TORC1 and indicates that failure to induce autophagy is the underlying defect in *vps501* $\Delta$ *sea1* $\Delta$  cells. In addition, the autophagy defects observed in *vps501* $\Delta$  *sea1* $\Delta$  cells were specifically observed upon autophagy induction through nitrogen deprivation and not through rapamycin treatment. Briefly, we found that *vps501* $\Delta$  *sea1* $\Delta$  mutant cells did not display autophagy influx defects when they received rapamycin treatment. Rapamycin is a potent lipophilic macrolide antifungal drug that inhibits TORC1 signaling and is widely used to induce autophagy in yeast$

(Barbet et al., 1996; Rohde et al., 2001). This suggests that Vps501 and Sea1 are likely operating upstream of TORC1, allowing rapamycin to bypass the autophagic defects of the *vps501Δ sea1Δ* mutant.

We also found that the Vps501-SEA complex mediates Atg27 trafficking from the vacuolar membrane. We do not believe that autophagy triggers this phenomenon directly, since autophagy-deficient *atg1Δ* cells display only a minor loss of Atg27 trafficking. Instead, we believe that Vps501-SEA control over Atg27 trafficking may be an indirect consequence of TORC1 hyperactivation at the signaling endosome. Further studies are needed to test this hypothesis.

Collectively, these findings lead us to propose a new model for Vps501 function at the vacuolar membrane (Figure 9). When wildtype cells are deprived of nitrogen, the SEA complex acts through effector molecules such as the EGO complex to inhibit TORC1 and facilitate autophagic induction. Vps501 acts as a structural stabilizer to tether the SEA complex to the vacuolar membrane, relying on its direct interaction with Sea1 and the lipid interactions of its non-canonical PX domain to facilitate the induction of autophagy and proper Atg27 trafficking. In contrast, *vps501Δ sea1Δ* cells exhibit destabilization of the SEA complex, causing TORC1 to remain active under nitrogen-starved conditions. This results in defects both in the induction of autophagy and in Atg27 trafficking.

## Materials and Methods

### *Phylogenetic Analysis*

To determine the identity of *Saccharomyces cerevisiae* YKR078W in relation to other SNX-BAR sorting nexins, we conducted a phylogenetic analysis. We used a former analysis of SNX-BAR proteins in opisthokonts (e.g., fungi Vps5, and Vps17, animal and choanoflagellate SNX 5/6/32 and SNX 1/2) by Koumandou et al. (2011) as an initial seed alignment. We added additional



Vps5 proteins from other fungal species from the family Saccharomycetaceae for better resolution of fungal Vps5 proteins, including YKR078W. Furthermore, in order to identify if other fungi have a protein similar to YKR078W, we used BLASTp to query protein models at FungalDB to identify additional SNX-BAR sorting nexins with similarity to YKR078W from *S. cerevisiae*. These searches only recovered the single Vps5 protein from the fungal species. No additional proteins were detected with an E-value less than 10 (search threshold). Full-length sequences for all taxa for each gene family were aligned with Muscle 3.6 (Edgar, 2004) and edited manually in the case of clear errors. Maximum likelihood analyses were conducted with RAxML v.8.2.4 (Stamatakis, 2014) using a LG+G matrix model determined by ProtTest v.3, (Darriba et al., 2011) and a trimmed alignment containing the conserved PX +BAR and SNX-BAR domains. Support for particular nodes for maximum likelihood analyses was assessed with 1,000 bootstraps. Trees were visualized and illustrated with FigTree v1.4 (<http://tree.bio.ed.ac.uk/software/figtree/>).

### Yeast Strains and Culture Conditions

Yeast strains were grown using standard media and conditions (Guthrie and Fink, 1991) unless indicated. Yeast strains were constructed in BY4742 (*MAT $\alpha$  his3-1, leu2-0, met15-0, and ura3-0*) by homologous recombination of gene-targeted, polymerase chain reaction (PCR)-generated DNAs using the method of Longtine et al. (Longtine et al., 1998) and/or derived from the EUROSCARF KANMX deletion collection (Open Biosystems/Thermo Scientific, Waltham, MA) or produced by replacement of the complete reading frame with the *HIS3MX6* or *URA3* cassette. Gene deletions were confirmed by PCR amplification of the deleted locus. Cells were grown in standard synthetic complete medium lacking nutrients required to maintain selection for auxotrophic markers and/or plasmid, unless indicated otherwise. To induce bulk or non-selective autophagy, cells were grown to log phase, harvested, and transferred to SD(-N) medium for nitrogen starvation (2% dextrose, 0.17% Yeast Nitrogen Base without amino acids and without



373 ammonium sulfate) for 16 hours.

374 For the construction of an integrated N terminal GFP-Vps501 yeast strain under a GPD  
375 promoter, we PCR amplified pGFP-<sup>GPD</sup>Vps501 (described below) using the following primers that  
376 included 50 bp flanking the *VPS501* locus;  
377 ATCAGAACTGCAACCCTACAGATTAGATATGGAGAACGACAAGGCGTCACGTGAGCAAGG  
378 GCGAGGAGCTGTTCA and  
379 GCTTTTTCAGTAGTAAATTATCTTCTTTAATTACGTTATTATGTACATATTTGGCTTATGTGCT  
380 CATCTGGTACA). PCR products were subsequently transformed into cells ablated for *VPS501*  
381 (by replacement with a URA marker) and allowed to homologously recombine into the *VPS501*  
382 locus. Resulting clones were selected on F.O.A 5-Fluoroorotic Acid (5-FOA) and confirmed by  
383 PCR.

#### 384 *Light Microscopy and Image Analysis*

385 Yeast cells from cultures grown to  $OD_{600} \approx 0.5$  were mounted in growth medium, and 3D  
386 image stacks were collected at 0.3- $\mu$ m z increments on a DeltaVision elite workstation (Cytiva)  
387 based on an inverted microscope (IX-70; Olympus) using a 100 $\times$ 1.4NA oil immersion lens. Images  
388 were captured at 24°C with a 12-bit charge-coupled device camera (CoolSnap HQ; Photometrics)  
389 and deconvolved using the iterative-constrained algorithm and the measured point spread  
390 function. To visualize vacuole morphology, yeast cells were labeled with 7-  
391 Aminochloromethylcoumarin (CMAC; Life Technologies) at a concentration of 100  $\mu$ M for 30 min  
392 in synthetic medium at room temperature. To visualize the vacuole membrane, FM4-64 (32nM)  
393 was added to cell cultures for 20 min at 30°C. Cells were then washed, resuspended in fresh  
394 medium, and then incubated for 60 minutes to allow FM4-64 to accumulate in the vacuole  
395 membrane adapted from (Vida and Emr, 1995). Image analysis and preparation was done using  
396 Softworx 6.5 (Cytiva) and ImageJ v1.50d (Rasband).

397 The analysis of vacuole membrane localization for GFP-Vps501, GFP-Vps501<sup>YKAA</sup> and  
 398 Atg27-2XGFP was determined using a manual method implemented using ImageJ v1.53c  
 399 (Rasband). A region of interest (ROI) was selected to contain a single cell and the total sum of  
 400 GFP fluorescence was calculated (TF). Next, we used the Mask macro to delineate the vacuole  
 401 ROI defined by FM4-64 and overlaid onto the GFP channel to define the vacuole fluorescence  
 402 (VF). To calculate cytosol fluorescence intensity (CF), the vacuole mask was inverted so that all  
 403 pixels outside of the mask were assigned a maximum value and the regions corresponding the  
 404 vacuole signal were assigned a value of zero. A ratio of the VF to TF is presented in the graphs.  
 405 Vacuole membrane localization for Seh1-GFP, Sec13-GFP and Atg27-2xGFP, were calculated  
 406 by calculating the percent of cells with GFP signal on the vacuole using FM4-64 and CMAC as  
 407 visual guides to determine vacuole boundaries. To quantify vacuole lumen localization, wildtype  
 408 cells or mutants were visually scored for presence of GFP in the vacuole lumen. Kog1-GFP puncta  
 409 numbers were quantified from z stacks collected at 0.3- $\mu$ m intervals. Total patches/cell were  
 410 counted from maximum intensity projections from small budded cells. A minimum of 100 cells was  
 411 used in all experimental conditions and performed in biological triplicate.

#### 412 *GFP-Atg8 Processing and Immunoblotting*

413 For quantitative immunoblot analysis of GFP-Atg8, cells were grown under standard  
 414 vegetative or autophagy inducing conditions to OD<sub>600</sub>  $\approx$  0.5, as described above. Typically, 3.0 x  
 415 10<sup>7</sup> cells were harvested by centrifugation and lysed by glass bead agitation in SDS-PAGE sample  
 416 buffer. 10% polyacrylamide gels were loaded with 5.0 X10<sup>7</sup> cell equivalents and transferred onto  
 417 standard 0.45  $\mu$ m nitrocellulose. Anti-GFP primary mouse monoclonal antibody (1814460, Roche)  
 418 was diluted 1:2500 and Santa Cruz (sc-2055) goat anti-mouse HRP-conjugated antibody was  
 419 used at 1:10000. Anti-Pgk1 at 1:5000 (Life Technologies) was used as loading controls.  
 420 Centromeric GFP-Atg8 (Shintani et al., 2002) plasmids were used in the processing assays.

Atg13 immunoblots were done as previously described (Kamada, 2017) with the following modifications.  $3.0 \times 10^7$  cells were harvested by centrifugation and precipitated by Trichloroacetic acid (TCA). 7.5% polyacrylamide gels were loaded with  $0.75 \times 10^7$  cell equivalents. Anti-Atg13 primary rabbit antibody was generously provided by Dr. Yoshiaki Kamada and used at 1:5000 and goat anti-rabbit HRP-conjugated antibody was used at 1:5000. p3xHA-Atg13 was purchased from Addgene (Plasmid #59544) and used in all indicated experiments. All enhanced chemiluminescence (ECL) blots were development on a Chemidoc-MP (Bio-Rad) and band intensities were quantified using Quantity One 1D analysis software (Bio-Rad) and all statistical analysis done using GraphPad Prism 8.

### *Plasmids*

pGFP-<sup>GPD</sup>Vps501 was constructed using Gateway cloning. Plasmid insert was made using PCR amplified wild-type genomic *VPS501* locus with the following primers: GGGGACAAGTTTGTACAAAAAAGCAGGCTTAGAGAACGACAAGGCGTCACAT and GGGGACCACTTTGTACAAGAAAGCTGGGTTTCATTGGCTTATGTGCTCATCTGGT and cloned using a BP recombination reaction into pDONR221. Resulting DONOR vector was recombined with pAG425GPD-EGFP-ccDB (Alberti et al., 2007) in a final LR recombination reaction to generate the pAG415GPD-eGFP-Vps501 expression clone (pGFP-<sup>GPD</sup>Vps501).

pGFP-Vps501<sup>YKAA</sup> was made commercially using site-directed mutagenesis (GenScript, Piscataway, NJ), introducing alanine mutations into following positions Y160A and K170A of pGFP-<sup>GPD</sup>Vps501. pVps501<sup>YKAA</sup> was derived from pGFP-Vps501<sup>YKAA</sup> using Gateway cloning as described above.

### *Mass spectrometry*

Yeast strains expressing GFP-Vps501 were grown to  $0.5 \times 10^7$  cell density in YPD media. GFP

fusion proteins were purified as follows: 200mg of protein extract was incubated with GFP-Trap Magnetic Agarose (ChromoTek) at 4°C for 20 minutes with gentle agitation. GFP-Trap beads were collected and washed five times (50mM Tris-HCL pH 7.4, 150mM NaCl, Roche complete Protease Inhibitor Cocktail EDTA free). After the final wash, the buffer was aspirated and the GFP-Trap beads were incubated with 5x SDS-PAGE sample buffer and denatured for five minutes at 95°C. 20  $\mu$ L of each sample was analyzed by SDS-PAGE, followed by an immunoblot. The experiment was performed in triplicate and normalized to the Nano-Trap magnetic beads alone.

#### *Trypsin digestion of samples from SDS-PAGE gel plugs*

The gel plugs for each sample were excised by a sterile razor blade, divided into 2 sections 1 cm each, and additionally chopped into 1 mm pieces. Each section was washed in dH<sub>2</sub>O and destained using 100 mM NH<sub>4</sub>HCO<sub>3</sub> pH 7.5 in 50% acetonitrile. A reduction step was performed by addition of 100 ml 50mM NH<sub>4</sub>HCO<sub>3</sub> pH 7.5 and 10 ml of 200mMtris(2-carboxyethyl) phosphine HCl at 37°C for 30 min. The proteins were alkylated by addition of 100 ml of 50 mM iodoacetamide prepared fresh in 50 mM NH<sub>4</sub>HCO<sub>3</sub> pH 7.5 buffer, and allowed to react in the dark at 20°C for 30 min. Gel sections were washed in water, then acetonitrile, and vacuum dried. Trypsin digestion was carried out overnight at 37°C with 1:50-1:100 enzyme-protein ratio of sequencing grade-modified trypsin (Promega) in 50 mM NH<sub>4</sub>HCO<sub>3</sub> pH 7.5, and 20mM CaCl<sub>2</sub>. Peptides were extracted with 5% formic acid and vacuum dried and sent to the Mayo Clinic Proteomics Core facility for HPLC and LC-MS/MS data acquisition.

#### *HPLC for mass spectrometry*

All samples were re-suspended in Burdick & Jackson HPLC-grade water containing 0.2% formic acid (Fluka), 0.1% TFA (Pierce), and 0.002% Zwittergent 3-16 (Calbiochem), a sulfobetaine detergent that contributes the following distinct peaks at the end of chromatograms: MH<sup>+</sup> at 392, and in-source dimer [2 M<sup>+</sup> H<sup>+</sup>] at 783, and some minor impurities of Zwittergent 3-12 seen as MH<sup>+</sup>

at 336. The peptide samples were loaded to a 0.25 ml C8 OptiPak trapping cartridge custom-packed with Michrom Magic (Optimize Technologies) C8, washed, then switched in-line with a 20 cm by 75 mm C18 packed spray tip nano column packed with Michrom Magic C18AQ, for a 2-step gradient. Mobile phase A was water/acetonitrile/formic acid (98/2/0.2) and mobile phase B was acetonitrile/isopropanol/water/formic acid (80/10/10/0.2). Using a flow rate of 350 nL/min, a 90 min, 2-step LC gradient was run from 5% B to 50% B in 60 min, followed by 50%-95% B over the next 10 min, hold 10 min at 95% B, back to starting conditions and re-equilibrated.

### *LC-MS/MS analysis*

Electrospray tandem mass spectrometry (LC-MS/MS) was performed at the Mayo Clinic Proteomics Core on a Thermo Q-Exactive Orbitrap mass spectrometer, using a 70,000 RP survey scan in profile mode,  $m/z$  340-2000 Da, with lock masses, followed by 20 MSMS HCD fragmentation scans at 17,500 resolution on doubly and triply charged precursors. Single charged ions were excluded, and ions selected for MS/MS were placed on an exclusion list for 60 s.

### *LC-MS/MS data analysis, statistical analysis*

All LC-MS/MS \*.raw Data files were analyzed with MaxQuant version 1.5.2.8, searching against the SPROT *Saccharomyces cerevisiae* database downloaded 09.28.2017 and searched using the following criteria: LFQ quantification with a min of 1 high confidence peptide. Trypsin was selected as the protease with max miss cleavage set to 2. Carbamidomethyl (C) was selected as a fixed modification. Variable modifications were set to Deamidation (NQ), Oxidization (M), Formylation (n-term), and Phosphorylation (STY). Orbitrap mass spectrometer was selected using a MS error of 20 ppm and a MS/MS error of 0.5 Da. A 1% FDR cutoff was selected for peptide, protein, and site identifications. LFQ Intensities were reported based on the MS level peak areas determined by MaxQuant and reported in the proteinGroups.txt file. Proteins were removed from the results file if they were flagged by MaxQuant as “Contaminants”, “Reverse” or “Only identified

by site". Complete three biological replicates were performed. The abundance data from each biological replicate were normalized to the ratio of Vps501 bait protein in that biological replicate. LFQ Peak intensities were analyzed in each run to determine protein hits that fell into the category of either Vps501 elution (VE) only hits or Bead elution (BE) only hits and retained if they confirmed to VE state across all 3 runs. LFQ Sig cutoffs are Sig Up > 1.2 ratio (Log2 0.26) and Sig Down < 0.8 ratio (Log2 -0.32). Any hits that were not observed in at least 2 replicates each were labeled 'no quant' (a normalized ratio was still calculated but not included in final data set analysis). A list of proteins identified and corresponding ratios can be found in Supplemental Materials. The mass spectrometry proteomic data have been deposited to the ProteomeXchange Consortium (<http://proteomecentral.proteomexchange.org>) (Deutsch et al., 2017) via the PRIDE partner repository (Vizcaino et al., 2013; Vizcaino et al., 2016).

## Acknowledgements

We are grateful to Mandi Ma and members of the Chi, Truman, and Reitzel Labs for thoughtful discussions and comments on this manuscript. This work was supported by the National Science Foundation 2028519 to RJC, National Institutes of Health award 1R01GM139885 to AWT, and UNC Charlotte Faculty Research Grants Program to RJC and AMR.

**Abbreviations List:** BAR: Bin-Amphiphysin-Rvs161 (BAR) homology; CBB: coomassie brilliant blue; GFP: Green Fluorescent Protein; ORF: Open reading frame; PGK: phosphoglycerate kinase; PX: Phox homology domain; PI3P: phosphatidylinositol-3-phosphate; ROI: region of interest; SNX: sorting nexin; SNX-BAR: sorting nexin containing a BAR domain; WT: wild-type; TEN: Tubular Endosomal Network; VL: Vacuolar Lumen; VM: Vacuolar Membrane; WT: wild-type.

## 514 References

- 515 Alberti, S., A.D. Gitler, and S. Lindquist. 2007. A suite of Gateway cloning vectors for high-  
516 throughput genetic analysis in *Saccharomyces cerevisiae*. *Yeast*. 24:913-919.
- 517 Algret, R., J. Fernandez-Martinez, Y. Shi, S.J. Kim, R. Pellarin, P. Cimermancic, E. Cochet, A.  
518 Sali, B.T. Chait, M.P. Rout, and S. Dokudovskaya. 2014. Molecular architecture and  
519 function of the SEA complex, a modulator of the TORC1 pathway. *Mol Cell Proteomics*.  
520 13:2855-2870.
- 521 Anton, Z., V.M.S. Betin, B. Simonetti, C.J. Traer, N. Attar, P.J. Cullen, and J.D. Lane. 2020. A  
522 heterodimeric SNX4--SNX7 SNX-BAR autophagy complex coordinates ATG9A trafficking  
523 for efficient autophagosome assembly. *J Cell Sci*. 133.
- 524 Barbet, N.C., U. Schneider, S.B. Helliwell, I. Stansfield, M.F. Tuite, and M.N. Hall. 1996. TOR  
525 controls translation initiation and early G1 progression in yeast. *Mol Biol Cell*. 7:25-42.
- 526 Binda, M., M.P. Peli-Gulli, G. Bonfils, N. Panchaud, J. Urban, T.W. Sturgill, R. Loewith, and C.  
527 De Virgilio. 2009. The Vam6 GEF controls TORC1 by activating the EGO complex. *Mol*  
528 *Cell*. 35:563-573.
- 529 Burd, C., and P.J. Cullen. 2014. Retromer: a master conductor of endosome sorting. *Cold*  
530 *Spring Harb Perspect Biol*. 6.
- 531 Chandra, M., Y.K. Chin, C. Mas, J.R. Feathers, B. Paul, S. Datta, K.E. Chen, X. Jia, Z. Yang,  
532 S.J. Norwood, B. Mohanty, A. Bugarcic, R.D. Teasdale, W.M. Henne, M. Mobli, and B.M.  
533 Collins. 2019. Classification of the human phox homology (PX) domains based on their  
534 phosphoinositide binding specificities. *Nat Commun*. 10:1528.
- 535 Chen, Z., P.C. Malia, R. Hatakeyama, R. Nicastro, Z. Hu, M.P. Peli-Gulli, J. Gao, T. Nishimura,  
536 E. Eskes, C.J. Stefan, J. Winderickx, J. Dengjel, C. De Virgilio, and C. Ungermann. 2021.  
537 TORC1 Determines Fab1 Lipid Kinase Function at Signaling Endosomes and Vacuoles.  
538 *Curr Biol*. 31:297-309 e298.
- 539 Chi, R.J., M.S. Harrison, and C.G. Burd. 2015. Biogenesis of endosome-derived transport  
540 carriers. *Cell Mol Life Sci*. 72:3441-3455.
- 541 Chi, R.J., J. Liu, M. West, J. Wang, G. Odorizzi, and C.G. Burd. 2014. Fission of SNX-BAR-  
542 coated endosomal retrograde transport carriers is promoted by the dynamin-related  
543 protein Vps1. *J Cell Biol*. 204:793-806.
- 544 Darriba, D., G.L. Taboada, R. Doallo, and D. Posada. 2011. ProtTest 3: fast selection of best-fit  
545 models of protein evolution. *Bioinformatics*. 27:1164-1165.
- 546 Deutsch, E.W., A. Csordas, Z. Sun, A. Jarnuczak, Y. Perez-Riverol, T. Ternent, D.S. Campbell,  
547 M. Bernal-Llinares, S. Okuda, S. Kawano, R.L. Moritz, J.J. Carver, M. Wang, Y.  
548 Ishihama, N. Bandeira, H. Hermjakob, and J.A. Vizcaino. 2017. The ProteomeXchange  
549 consortium in 2017: supporting the cultural change in proteomics public data deposition.  
550 *Nucleic Acids Res*. 45:D1100-D1106.
- 551 Dokudovskaya, S., and M.P. Rout. 2011. A novel coatomer-related SEA complex dynamically  
552 associates with the vacuole in yeast and is implicated in the response to nitrogen  
553 starvation. *Autophagy*. 7:1392-1393.
- 554 Dokudovskaya, S., and M.P. Rout. 2015. SEA you later alli-GATOR--a dynamic regulator of the  
555 TORC1 stress response pathway. *J Cell Sci*. 128:2219-2228.
- 556 Dokudovskaya, S., F. Waharte, A. Schlessinger, U. Pieper, D.P. Devos, I.M. Cristea, R.  
557 Williams, J. Salamero, B.T. Chait, A. Sali, M.C. Field, M.P. Rout, and C. Dargemont.  
558 2011. A conserved coatomer-related complex containing Sec13 and Seh1 dynamically  
559 associates with the vacuole in *Saccharomyces cerevisiae*. *Mol Cell Proteomics*. 10:M110  
560 006478.



- Dong, X., Y. Yang, Z. Zou, Y. Zhao, B. Ci, L. Zhong, M. Bhawe, L. Wang, Y.C. Kuo, X. Zang, R. Zhong, E.R. Aguilera, R.B. Richardson, B. Simonetti, J.W. Schoggins, J.K. Pfeiffer, L. Yu, X. Zhang, Y. Xie, S.L. Schmid, G. Xiao, P.A. Gleeson, N.T. Ktistakis, P.J. Cullen, R.J. Xavier, and B. Levine. 2021. Sorting nexin 5 mediates virus-induced autophagy and immunity. *Nature*. 589:456-461.
- Edgar, R.C. 2004. MUSCLE: multiple sequence alignment with high accuracy and high throughput. *Nucleic Acids Res.* 32:1792-1797.
- Gallon, M., and P.J. Cullen. 2015. Retromer and sorting nexins in endosomal sorting. *Biochem Soc Trans.* 43:33-47.
- Goyal, S., M. R. Robinson, V. A. Segarra, and R. J. Chi. 2020. Intracellular Lipid Homeostasis and Trafficking in Autophagy. *In Cell Growth*.
- Hanley, S.E., S.D. Willis, and K.F. Cooper. 2021. Snx4-assisted vacuolar targeting of transcription factors defines a new autophagy pathway for controlling ATG expression. *Autophagy*:1-19.
- Hatakeyama, R., M.P. Peli-Gulli, Z. Hu, M. Jaquenoud, G.M. Garcia Osuna, A. Sardu, J. Dengjel, and C. De Virgilio. 2019. Spatially Distinct Pools of TORC1 Balance Protein Homeostasis. *Mol Cell.* 73:325-338 e328.
- Henkel, V., L. Schurmanns, M. Brunner, A. Hamann, and H.D. Osiewacz. 2020. Role of sorting nexin PaATG24 in autophagy, aging and development of *Podospora anserina*. *Mech Ageing Dev.* 186:111211.
- Horazdovsky, B.F., B.A. Davies, M.N. Seaman, S.A. McLaughlin, S. Yoon, and S.D. Emr. 1997. A sorting nexin-1 homologue, Vps5p, forms a complex with Vps17p and is required for recycling the vacuolar protein-sorting receptor. *Mol Biol Cell.* 8:1529-1541.
- Huh, W.K., J.V. Falvo, L.C. Gerke, A.S. Carroll, R.W. Howson, J.S. Weissman, and E.K. O'Shea. 2003. Global analysis of protein localization in budding yeast. *Nature*. 425:686-691.
- Kamada, Y. 2017. Novel tRNA function in amino acid sensing of yeast Tor complex1. *Genes Cells.* 22:135-147.
- Kamada, Y., T. Funakoshi, T. Shintani, K. Nagano, M. Ohsumi, and Y. Ohsumi. 2000. Tor-mediated induction of autophagy via an Apg1 protein kinase complex. *J Cell Biol.* 150:1507-1513.
- Koumandou, V.L., M.J. Klute, E.K. Herman, R. Nunez-Miguel, J.B. Dacks, and M.C. Field. 2011. Evolutionary reconstruction of the retromer complex and its function in *Trypanosoma brucei*. *J Cell Sci.* 124:1496-1509.
- Longtine, M.S., A. McKenzie, 3rd, D.J. Demarini, N.G. Shah, A. Wach, A. Brachat, P. Philippsen, and J.R. Pringle. 1998. Additional modules for versatile and economical PCR-based gene deletion and modification in *Saccharomyces cerevisiae*. *Yeast.* 14:953-961.
- Ma, M., C.G. Burd, and R.J. Chi. 2017. Distinct complexes of yeast Snx4 family SNX-BARs mediate retrograde trafficking of Snc1 and Atg27. *Traffic.* 18:134-144.
- Ma, M., S. Kumar, L. Purushothaman, M. Babst, C. Ungermann, R.J. Chi, and C.G. Burd. 2018. Lipid trafficking by yeast Snx4 family SNX-BAR proteins promotes autophagy and vacuole membrane fusion. *Mol Biol Cell.* 29:2190-2200.
- Nakatogawa, H. 2020. Mechanisms governing autophagosome biogenesis. *Nat Rev Mol Cell Biol.* 21:439-458.
- Nemec, A.A., L.A. Howell, A.K. Peterson, M.A. Murray, and R.J. Tomko, Jr. 2017. Autophagic clearance of proteasomes in yeast requires the conserved sorting nexin Snx4. *J Biol Chem.* 292:21466-21480.
- Nothwehr, S.F., and A.E. Hindes. 1997. The yeast VPS5/GRD2 gene encodes a sorting nexin-1-like protein required for localizing membrane proteins to the late Golgi. *J Cell Sci.* 110 ( Pt 9):1063-1072.



- Panchaud, N., M.P. Peli-Gulli, and C. De Virgilio. 2013. SEACing the GAP that nEGOCiates TORC1 activation: evolutionary conservation of Rag GTPase regulation. *Cell Cycle*. 12:2948-2952.
- Rohde, J., J. Heitman, and M.E. Cardenas. 2001. The TOR kinases link nutrient sensing to cell growth. *J Biol Chem*. 276:9583-9586.
- Seaman, M.N., E.G. Marcusson, J.L. Cereghino, and S.D. Emr. 1997. Endosome to Golgi retrieval of the vacuolar protein sorting receptor, Vps10p, requires the function of the VPS29, VPS30, and VPS35 gene products. *J Cell Biol*. 137:79-92.
- Segarra, V.A., D.R. Boettner, and S.K. Lemmon. 2015. Atg27 tyrosine sorting motif is important for its trafficking and Atg9 localization. *Traffic*. 16:365-378.
- Shintani, T., W.P. Huang, P.E. Stromhaug, and D.J. Klionsky. 2002. Mechanism of cargo selection in the cytoplasm to vacuole targeting pathway. *Developmental cell*. 3:825-837.
- Stamatakis, A. 2014. RAXML version 8: a tool for phylogenetic analysis and post-analysis of large phylogenies. *Bioinformatics*. 30:1312-1313.
- Su, M.Y., W.H. Peng, M.R. Ho, S.C. Su, Y.C. Chang, G.C. Chen, and C.I. Chang. 2015. Structure of yeast Ape1 and its role in autophagic vesicle formation. *Autophagy*. 11:1580-1593.
- Sun, D., N.V. Varlakhanova, B.A. Tornabene, R. Ramachandran, P. Zhang, and M.G.J. Ford. 2020. The cryo-EM structure of the SNX-BAR Mvp1 tetramer. *Nat Commun*. 11:1506.
- Teasdale, R.D., and B.M. Collins. 2012. Insights into the PX (phox-homology) domain and SNX (sorting nexin) protein families: structures, functions and roles in disease. *Biochem J*. 441:39-59.
- van Weering, J.R., R.B. Sessions, C.J. Traer, D.P. Kloer, V.K. Bhatia, D. Stamou, S.R. Carlsson, J.H. Hurley, and P.J. Cullen. 2012. Molecular basis for SNX-BAR-mediated assembly of distinct endosomal sorting tubules. *EMBO J*. 31:4466-4480.
- van Weering, J.R., P. Verkade, and P.J. Cullen. 2010. SNX-BAR proteins in phosphoinositide-mediated, tubular-based endosomal sorting. *Semin Cell Dev Biol*. 21:371-380.
- Vida, T.A., and S.D. Emr. 1995. A new vital stain for visualizing vacuolar membrane dynamics and endocytosis in yeast. *J Cell Biol*. 128:779-792.
- Vizcaino, J.A., R.G. Cote, A. Csordas, J.A. Dienes, A. Fabregat, J.M. Foster, J. Griss, E. Alpi, M. Birim, J. Contell, G. O'Kelly, A. Schoenegger, D. Ovelheiro, Y. Perez-Riverol, F. Reisinger, D. Rios, R. Wang, and H. Hermjakob. 2013. The PRoteomics IDentifications (PRIDE) database and associated tools: status in 2013. *Nucleic Acids Res*. 41:D1063-1069.
- Vizcaino, J.A., A. Csordas, N. del-Toro, J.A. Dienes, J. Griss, I. Lavidas, G. Mayer, Y. Perez-Riverol, F. Reisinger, T. Ternent, Q.W. Xu, R. Wang, and H. Hermjakob. 2016. 2016 update of the PRIDE database and its related tools. *Nucleic Acids Res*. 44:D447-456.
- Yang, Z., and D.J. Klionsky. 2010. Mammalian autophagy: core molecular machinery and signaling regulation. *Curr Opin Cell Biol*. 22:124-131.
- Yen, W.L., J.E. Legakis, U. Nair, and D.J. Klionsky. 2007. Atg27 is required for autophagy-dependent cycling of Atg9. *Mol Biol Cell*. 18:581-593.

## Figure Legends

### **Figure 1. YKR078W/Vps501 is a paralog of Vps5 and resides on the vacuole membrane. (A)**

Phylogenetic analysis of Vps5-like SNX-BAR proteins in opisthokonts, animal, choanoflagellate and other family Saccharomycetaceae indicates the presence of a Vps5-like protein (YKR078W) in *Saccharomyces cerevisiae*, refereed here as Vps501. (B) Micrographs of Vps10-2XGFP in wildtype and indicated mutant cells. Vps501 does not have a role in Vps10 trafficking, despite the phylogenetic similarities with retromer SNX-BARs. (C) Vps501 localizes to the vacuole membrane as a N-terminal GFP fusion protein. GFP-Vps501 expression is shown as locus integrations using native promoter (top), GPD promoter (bottom) or ectopically expressed as a 2-micron plasmid (middle). C-terminal fusions were found to be non-functional, not shown. Vacuolar membranes are shown using FM4-64 dye. The scale bar indicates 5  $\mu$ m. See also supplemental figure 1.

### **Figure 2. Vps501 interacts with subunits of TORC1 and the SEA complex. (A) Mass**

spectrometry experimental design to identify Vps501 interactors. GFP-Vps501 and interactors were purified by GFP-Trap affinity purification and SDS-PAGE, followed by in-gel trypsin digestion. Resulting peptides were analyzed and identified by LC-MS/MS according to their relative enrichment. (B) Mass spectrometry analysis using STRING software identified strong interactions with Kog1, a subunit of the TORC1 complex and Sea1 and Seh1, subunits of the SEA complex. Subunits of the SEA complex and TORC1 are represented as nodes in the graphical network. Proteins colored in green (Sea1, Seh1 and Kog1) are those detected by this proteomic study. Lines connecting the nodes represent previously reported interactions. (C) Micrographs show GFP-Vps501 colocalizes with Sea1-mCherry, Kog1-mCherry, Seh1-mCherry at the vacuole membrane. The scale bar indicates 5  $\mu$ m.

**Figure 3. Vps501 requires Sea1 for vacuolar localization.** (A) Micrographs of GFP-Vps501 in wildtype and SEA complex mutant cells. GFP-Vps501 is significantly mislocalized in SEACIT mutant cells but not in SEACAT mutant cells. Note, *sec13Δ* cells are nonviable. (B) Vacuole membrane localization was quantified by comparing GFP-Vps501 VML/cytosol ratios in wildtype versus SEA complex mutants. A minimum of 100 cells were measured in triplicate; standard error of the mean was calculated. \* $p < 0.05$ , \*\*  $p < 0.01$ , \*\*\* $p < 0.001$  indicates significance as calculated by Student's t-test. See also supplemental figure 2.

**Figure 4. SEACIT subunits, Npr2 and Npr3 require Vps501 and Sea1 for vacuole localization.** (A) Npr2-GFP and Npr3-GFP localize to the vacuole membrane in wildtype cells. In *vps501Δ* or *sea1Δ* cells, Npr2-GFP and Npr3-GFP are mislocalized to the vacuole lumen (VL) in 10-40% of cells. In *vps501Δsea1Δ* cells, Npr2-GFP and Npr3-GFP are mislocalized to the VL in 85% of cells. (B) Graph represents vacuole lumen localization (VL) in wildtype cells or mutants, defined by visually scoring the presence of GFP in the vacuole lumen. The results are from three experiments and averaged using the standard error of the mean. Indicated significance is a comparison of wildtype to single deletions or double mutants. \* $p < 0.05$ , \*\*  $p < 0.01$ , \*\*\* $p < 0.001$  indicates significance as calculated by Student's t-test.

**Figure 5. *vps501Δsea1Δ* cells display a synthetic autophagy defect.** (A) Maximum projection micrographs of cells expressing GFP-Atg8 in wildtype and indicated mutant cells before and after nitrogen starvation. GFP-Atg8 is found in the vacuole lumen (VL) in wildtype cells after nitrogen starvation, indicating successful autophagic flux has occurred. In *atg1Δ* cells, autophagy induction is inhibited and GFP-Atg8 is absent in the VL. A similar phenotype is also seen only when cells are ablated for both Vps501 and Sea1, indicating a synthetic genetic interaction between Vps501 and Sea1 is critical for autophagy. Note, cells ablated for Npr2 and Npr3 also show major

autophagy defects as single knockouts and likely mask any synthetic phenotypes combined with Vps501 ablation. The scale bar indicates 5 $\mu$ m. (B) Quantitative immunoblotting was used to detect the amount of GFP-Atg8 flux before and after autophagy induction. There is a 3-fold decrease in GFP-Atg8 flux in *vps501 $\Delta$ sea1 $\Delta$*  cells, compared to single deletions, whereas there was no significant difference detected in Npr2 or Npr3 knockout cells. A representative immunoblot is shown. Anti-Pgk1 was used as a loading control. (C) Graph of quantification of GFP-Atg8 processing. The results are from three experiments and averaged using the standard error of the mean. Indicated significance is a comparison of wildtype to single deletions or double mutants. \* $p < 0.05$ , \*\*  $p < 0.01$ , \*\*\* $p < 0.001$  indicates significance as calculated by Student's t-test. See also supplemental figure 3.

**Figure 6. Vps501 non-canonical PX domain is required for localization and function at the vacuole membrane.** (A) Sequence alignments of human SNX1, SNX2 and yeast homologs VPS5 and VPS501 PX domains are shown. Blue indicates residues in the canonical PI3P motif. Magenta indicates key secondary lipid binding site residues. Vps501 canonical PI3P motif is not conserved, however, the non-canonical His/Tyr motif is conserved. (B) Alanine mutations to His/Tyr residues in the non-canonical motif resulted in GFP-Vps501<sup>YKAA</sup> mislocalized to the cytosol in *vps501 $\Delta$* , and *vps501 $\Delta$ sea1 $\Delta$*  cells, indicating Vps501's recruitment to the vacuole membrane is dependent on both PI3P recognition and Sea1 binding. The scale bar indicates 5 $\mu$ m. (C) Ectopic expression of Vps501<sup>YKAA</sup> failed to complement *vps501 $\Delta$ sea1 $\Delta$*  cells in GFP-Atg8 processing assays and severely impairs autophagy flux when expressed in *sea1 $\Delta$*  cells. (D) Top Graph, quantification of Vps501 localization was defined by vacuole membrane to cytosol ratios as described in material and methods. GFP-Vps501<sup>YKAA</sup> recruitment to the vacuole membrane is reduced by ~60% in *vps501 $\Delta$*  cells. When combined with ablation of Sea1 vacuole membrane localization is reduced by ~90%. Bottom Graph, quantification of GFP-Atg8 processing when

Vps501<sup>YKAA</sup> is ectopically expressed in wildtype, *vps501Δ*, or *vps501Δsea1Δ* cells. The results are from three experiments and averaged (standard deviation). Indicated significance is a comparison of wildtype to single deletions or double mutants. \*p<0.05, \*\* p<0.01, \*\*\*p<0.001 indicates significance as calculated by Student's t-test.

**Figure 7. *vps501Δsea1Δ* cells are defective in Atg27 cycling.** (A) Micrographs of Atg27-2XGFP in wildtype and indicated mutant cells. Atg27-2XGFP is typically localized to the vacuole membrane, the Golgi and endosomal compartments. In *atg1Δ* cells, Atg27-2XGFP cycling is less abundant on the vacuole membrane. In *vps501Δsea1Δ* cells, Atg27-2XGFP is significantly depleted from the vacuole membrane, indicating Atg27 cycling to and from the vacuole membrane is dependent on Vps501 and Sea1 function during autophagy induction. (B) Graph of the quantification of Atg27-2XGFP vacuolar localization as described in the text. Percentage of cells with Atg27 vacuole localization is between 85-95% in wildtype cells or in cells ablated for only Vps501 or Sea1 and is reduced ~20% *atg1Δ* cells and ~75% in *vps501Δsea1Δ* cells. The results are from three experiments and averaged using the standard error of the mean. Indicated significance is a comparison of wildtype to single deletions or double mutants. \*p<0.05, \*\* p<0.01, \*\*\*p<0.001 indicates significance as calculated by Student's t-test. The scale bar indicates 5μm.

**Figure 8. TORC1 and autophagy induction is defective in *vps501Δsea1Δ* cells.** (A) Micrographs of Kog1-2XGFP localization in wildtype and indicated mutant cells during vegetative growth. Kog1 a subunit of TORC1, typically localizes to the vacuole membrane and in dot-like structures juxtaposed the vacuole membrane, known as signaling endosomes. In *vps501Δsea1Δ* cells, these dot-like structures accumulate indicating the pool of signaling endosomes are enriched, while the vacuole TORC1 pool appears reduced. Vacuolar membranes are shown using FM4-64 dye. (B) The number of Kog1 dot-like structures were quantified in wildtype and indicated

mutant cells before and after nitrogen starvation as described in the text. Regardless of starvation conditions, there was a 2-fold increase in dot-like structures in *vps501Δsea1Δ* cells as compared to single mutants or wildtype cells (left graph). 3 or more dot-like structures were found in 80% of *vps501Δsea1Δ* cells, while single mutants or wildtype cells typically had 0-2 dots (right graph). \* $p < 0.05$ , \*\*  $p < 0.01$ , \*\*\* $p < 0.001$  indicates significance as calculated by a one-way ANOVA from three biological replicates. (C) Quantitative immunoblot analysis of Atg13 in wildtype and indicated mutant cells before and after nitrogen starvation. In wildtype, *vps501Δ* or *sea1Δ* cells, the majority of Atg13 is phosphorylated as indicated by an enrichment of the upper Atg13 band (labeled Atg13P) during vegetative growth, indicating TORC1 is active. In autophagy induction conditions, TORC1 is inactivated and the majority of Atg13 is not phosphorylated indicated by an enrichment of the lower band (labeled Atg13). In *vps501Δ sea1Δ* cells, Atg13 appears only phosphorylated indicating autophagy induction is defective in these mutants, regardless of nitrogen starvation. (D) Percentage of Atg13 phosphorylation was quantified by determining the proportion of Atg13P to total protein using densitometry. A representative immunoblot is shown. Anti-Pgk1 was used as a loading control. Indicated significance is a comparison of wildtype to single deletions or double mutants. \* $p < 0.05$ , \*\*  $p < 0.01$ , \*\*\* $p < 0.001$  indicates significance as calculated by Student's t-test from three biological replicates.

**Figure 9. Vps501 cooperates with the SEA complex to inactivate TORC1.** Under starvation conditions, Vps501 stabilizes the SEA complex to the vacuole membrane using a non-canonical PX domain and a direct interaction with Sea1. This interaction promotes SEACIT inactivation of TORC1 via the EGO/GTR complex, resulting in the induction autophagy with proper Atg27 cycling. In *vps501Δ sea1Δ* cells, the SEA complex is destabilized and TORC1 remains activate, resulting in defective autophagy induction and defective Atg27 cycling.

**Supplemental Figure 1. Sequence alignment of YKR078W/VPS501 to Vps5 proteins from other yeast taxa.** Full-length sequences for all taxa for each gene family were aligned with Muscle 3.6 (Edgar, 2004) and edited manually in the case of clear errors. Maximum likelihood analyses were conducted with RAxML v.8.2.4 (Stamatakis, 2014) using a LG+G matrix model determined by ProtTest v.3 (Darriba et al., 2011) and a trimmed alignment containing the conserved PX-BAR domains. Sc, *S. cerevisiae*, Cg, *C. glabrata*, Eg, *E. gossypi*, Sp, *S. pombe*.

**Supplemental Figure 2. SEACAT subunits, Sea2-GFP, Sea3-GFP, Sea4-GFP, Seh1-GFP and Sec13-GFP are partially mislocalized in *vps501Δsea1Δ* cells.** (A) Sea2-GFP, Sea3-GFP, Sea4-GFP and Sea1-GFP reside on the vacuole membrane in wildtype and *vps501Δ* cells, however are found in the vacuole lumen (VL) in *sea1Δ* cells and *vps501Δsea1Δ* cells. Note, *sea1Δ* cells appear to mask any effects of VPS501. (B) Vacuole lumen (VL) localization is defined by visually scoring the presence of GFP in the vacuole lumen. C) SEACAT subunits, Seh1-GFP and Sec13-GFP localize to the vacuole membrane in wildtype and *vps501Δ* cells, however are found enriched in non-vacuolar compartments in *sea1Δ* cells and *vps501Δsea1Δ* cells. Seh1 and Sec13 have previously reported nuclear and ER roles, respectively and are likely enriched on these structures when vacuole membrane localization is compromised. (B) Vacuole lumen (VL) localization as determined by calculating the percent of cells with GFP signal on the vacuole using CMAC as a visual marker to determine vacuole boundaries. The results are from three experiments and averaged using the standard error of the mean. Indicated significance is a comparison of wildtype to single deletions or double mutants. \* $p < 0.05$ , \*\*  $p < 0.01$ , \*\*\* $p < 0.001$  indicates significance as calculated by Student's t-test.

**Supplemental Figure 3. Vps501 interactions with the SEACAT complex during autophagy.** (A) Maximum projection micrographs of cells expressing GFP-Atg8 in wildtype and indicated



807 mutant cells before and after nitrogen starvation. The scale bar indicates 5µm. (B) Quantitative  
 808 immunoblotting was used to detect the amount of GFP-Atg8 flux before and after autophagy  
 809 induction. A partial reduction in GFP-Atg8 flux is seen when Vps501 is ablated in combination  
 810 with each of the SEACAT subunits with the most significant defect occurring in *seh1Δvps501Δ*  
 811 cells. A representative immunoblot is shown. Anti-Pgk1 was used as a loading control. (C) Graph  
 812 of quantification of GFP-Atg8 processing. The results are from three experiments and averaged  
 813 using the standard error of the mean. Indicated significance is a comparison of wildtype to single  
 814 deletions or double mutants. \*p<0.05, \*\* p<0.01, \*\*\*p<0.001 indicates significance as calculated  
 815 by Student's t-test.

816



Figure 1

A

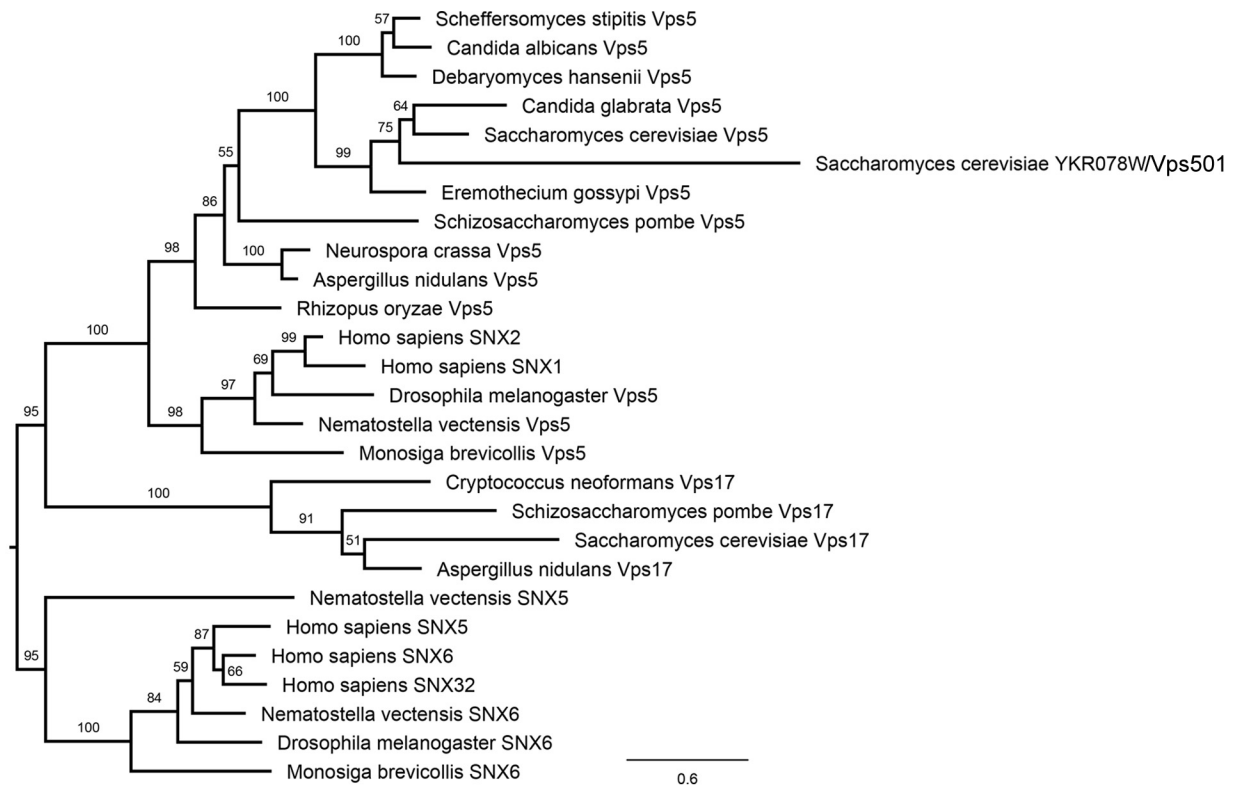

B

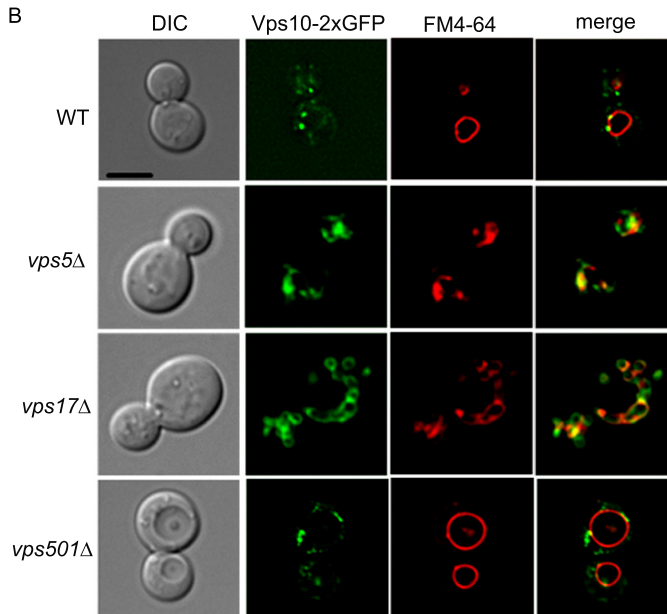

C

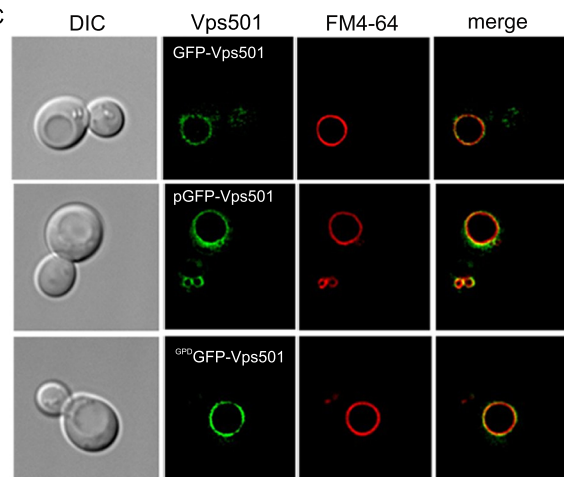

Figure 2

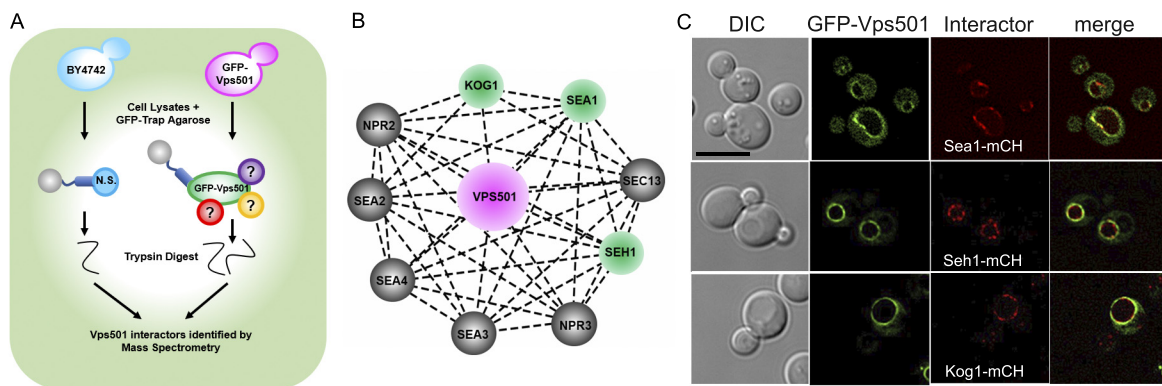

Figure 3

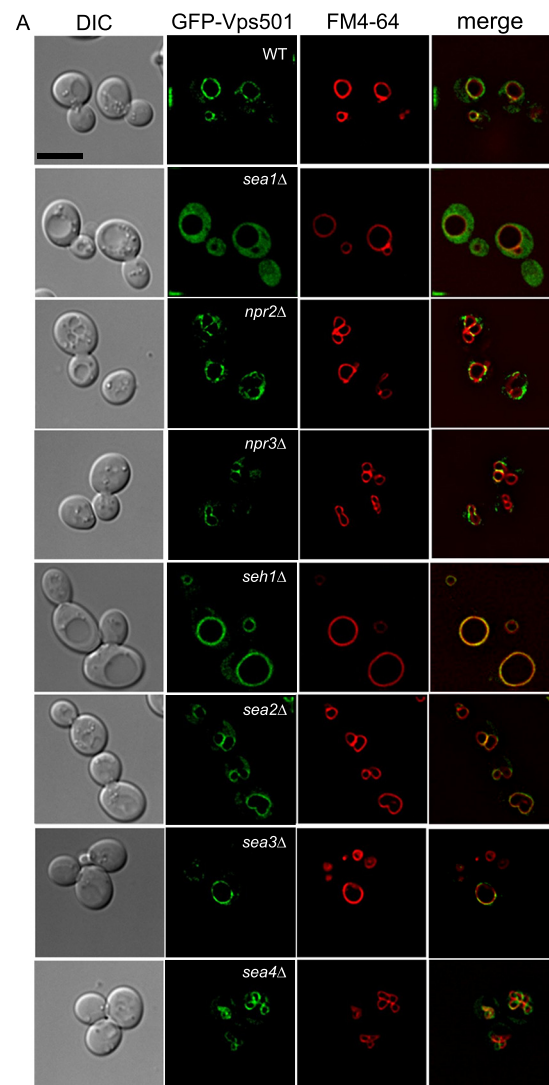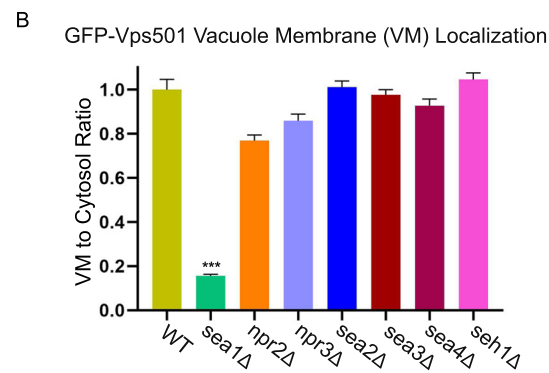

Figure 4

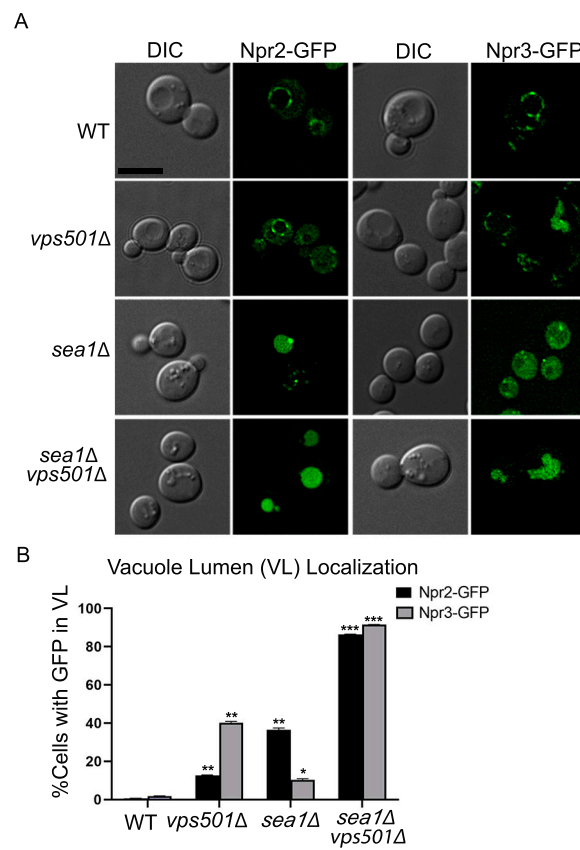

Figure 5

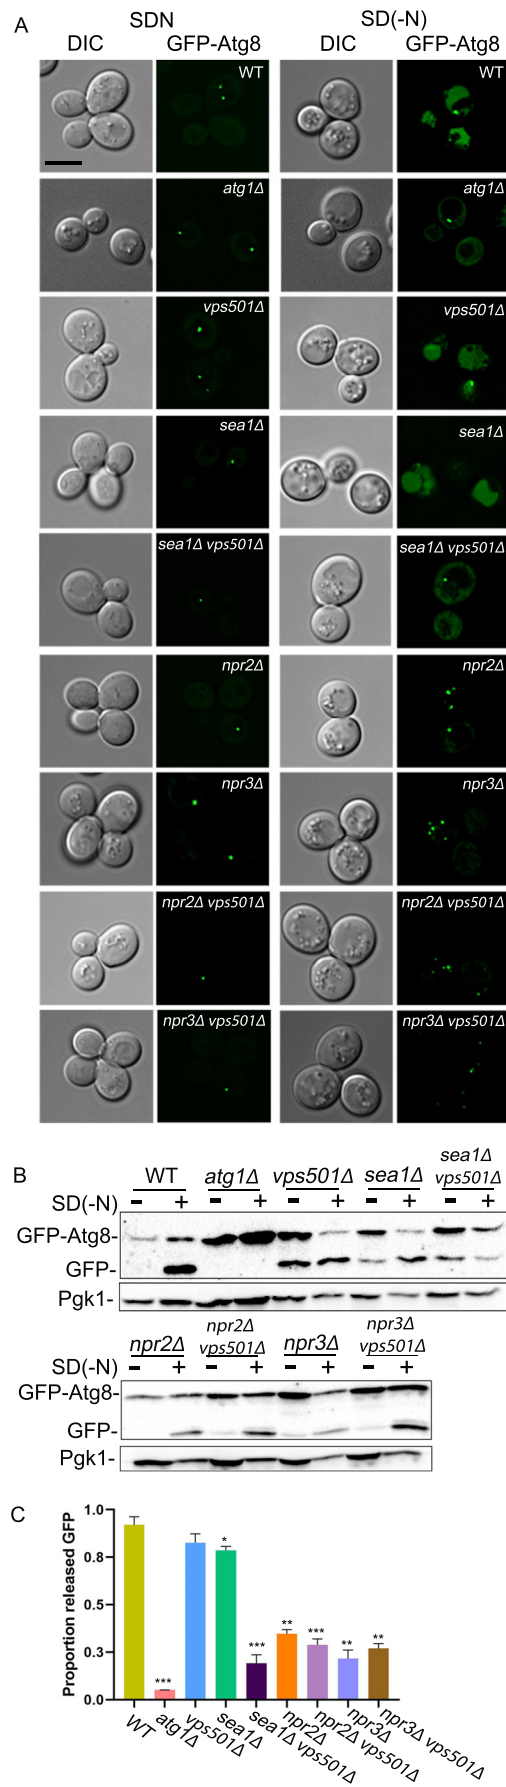

Figure 6

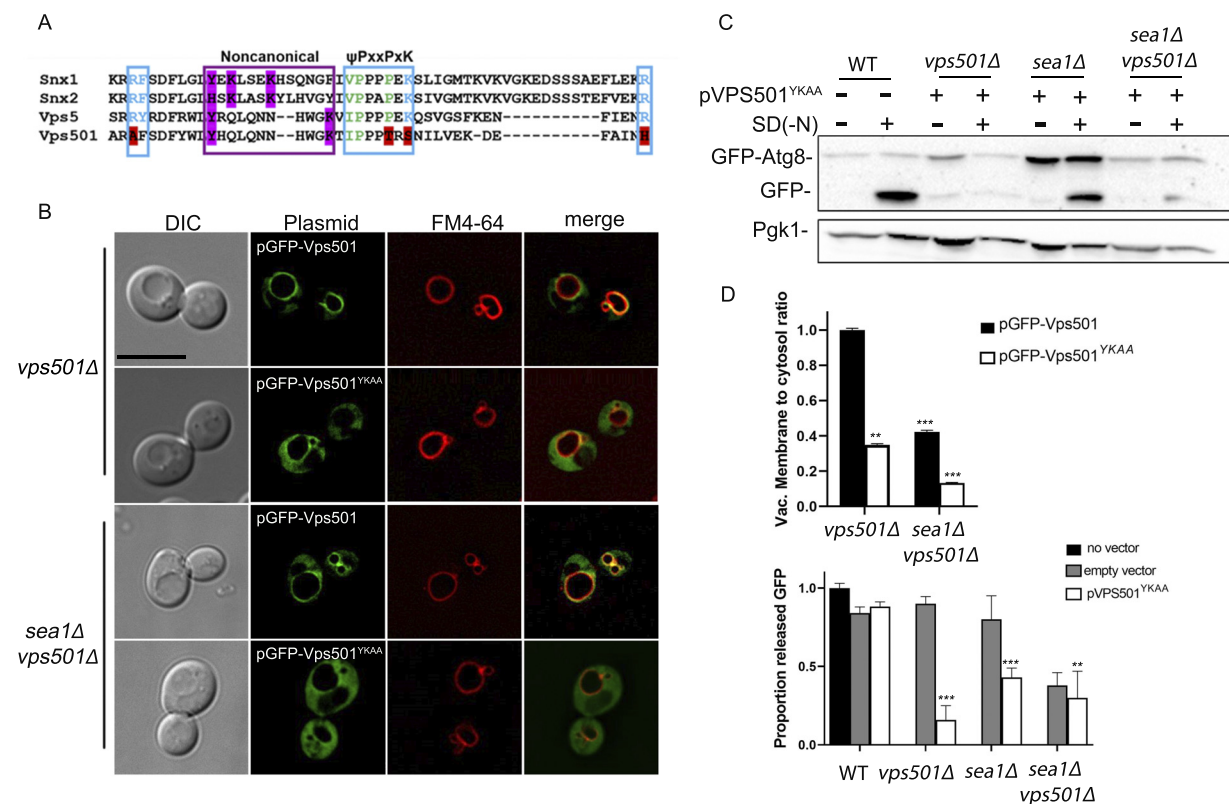

Figure 7

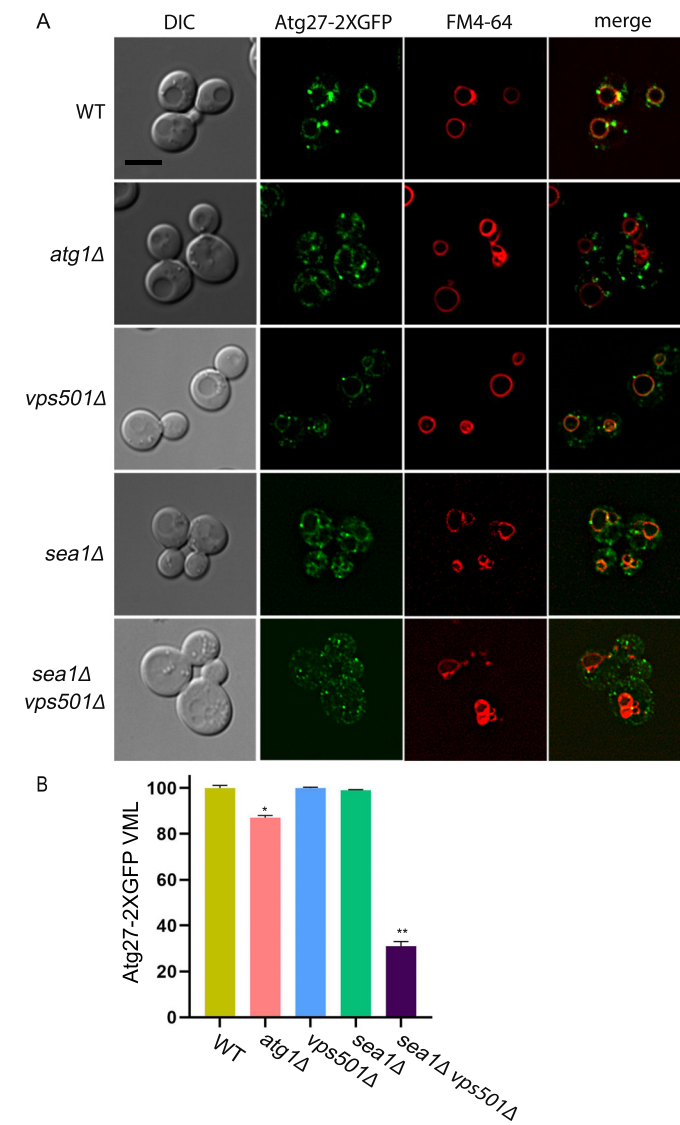



Figure 8

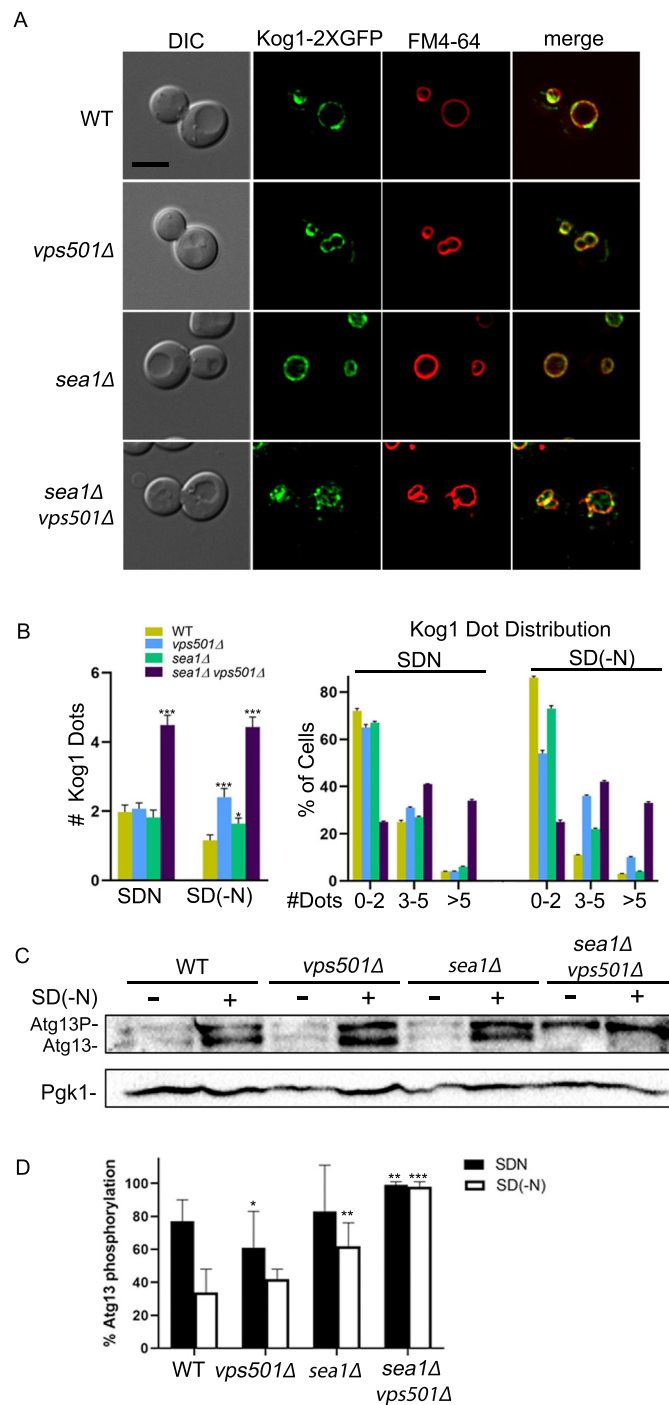

Figure 9

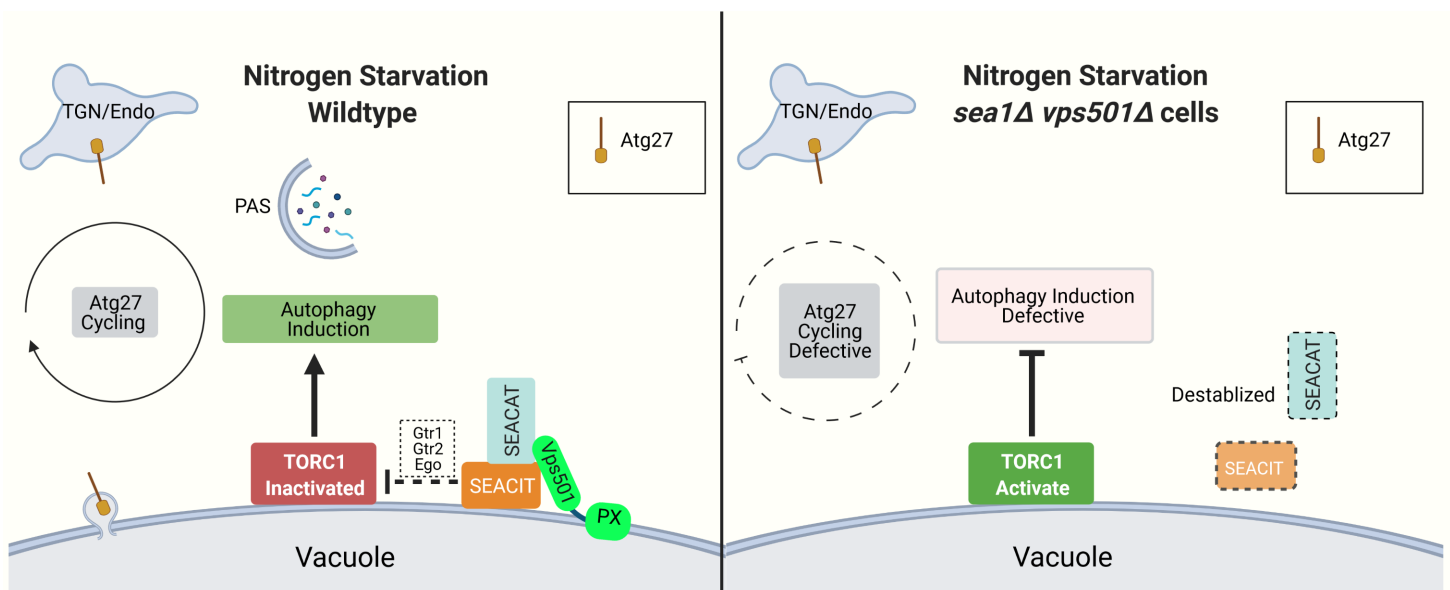

# Supplemental Figure 1

YKR078W : -----\*-----20-----\*-----40-----\*-----60-----\*-----80-----\*

ScVps5 : ---MDYEDNLEAPVMDLNHEGDKTQSLVSNISIESIGQISTNEERKDNELLETTASFAKDIDLDAPAEWKDPGLSVAGNPQLEEHDNSK

CgVps5 : ---MDYEDDLAPVMD-----LNPLAEADTVEETALSEEIEEQSESDSGEEEVQV

EgVps5 : ---MDSNNWLEAPKIGS-----ATDNTVGQLSQTGLTGGVGLGSSAAKEELEHN-----

SpVps5 : MLGHNIYEDDAFNPAD-----SVSPLNPPKLDQEPESAEGV---EEESP-----

YKR078W : -----100-----\*-----120-----\*-----140-----\*-----160-----\*-----180

ScVps5 : ADDLINSLAPEQDPIADLNKSTTQFIATRESGGALFTGNANSPLVFDDT---TYDANTSPNTSKSISGRRSGKPRILFDSARAQRNSKR

CgVps5 : DSTSGGWGDNNTKKELLNDLAPMEDPLSGLLNESPSKRGTTTPGALFESQTAPLISINEDDLSASSYTAAGHSTPRKLFDSRIRNRNIK

EgVps5 : -----AWGAGPERTGNENDGAEQEEHSQKILSTLAPHEDPLQGLGEIRSPGKDDPLFAGGSPLTVE

SpVps5 : -----NVQASPPKTHIYTSFRKRSVNLKSLPFETTLTLDAPLGPLQFSDAPSMAPENNRLVGLNTK

YKR078W : -----\*-----200-----\*-----220-----\*-----240-----\*-----260-----\*

ScVps5 : NLSLKAKRTTASDDTIKTPTFTDPLKKAENEFEVVEPLDDRNERRENNEGKFTASVEKNILEQVDRPLYNL-PQTGANISSPAEVEENSE

CgVps5 : HNKTSEASQDIEDFPVISHFQIEVDPIKVGELSSHIKYTVNAESELLSPNQND---VDEPLDDRVTNSQHANSRIFEQVESPLYHISPEKKKAMDTNTDITPTESV

EgVps5 : PEPQGTNRAAGGKKHGVQRLFTTMRRAA-----LGAEQRADLIQDPLAREAAPTPAPAVEVARVAVQAEAPLFELPAQE

SpVps5 : INPLKGSSPALNADFSANKPWISEVNSFSPS-----PIGATENPTIPNSEQTVDTLDAASSAPNETHTVSSASSQKQGSTSLTDE

YKR078W : -----280-----\*-----300-----\*-----320-----\*-----340-----\*-----360

ScVps5 : KFGKTKIGSKVPPTEKAVA-FKVEVKDPVKVGELTSIIVEYTVISSLLELKYA---VSRRYRDFRWLYRQLQNNHMGKVIPIPPPEKQ

CgVps5 : HNKTSEASQDIEDFPVISHFQIEVDPIKVGELSSHIKYTVNAESELLSPNQND---VSRRYRDFRWLYRQLQNNHMGKVIPIPPPEKQ

EgVps5 : RVETAPAAPVALET-----FAIAVVDVVKVADRFSHVEYSVVRIRS--PLVGDAE-VSRRYRDFRWLYRQLQNNHMGKVIPIPPPEKQ

SpVps5 : NQKAHPAAAPQSLTP-----FYIQVHDEHTVKEIKKSHTVYSVSRLEEHNQPSVSNVTVORRYNDFAFLYQLLSNHPGCKIPIPEPEKQ

YKR078W : -----\*-----380-----\*-----400-----\*-----420-----\*-----440-----\*

ScVps5 : S-VG---S-----KENFIENRR---FQMSMLKKTQQPVLQDKDFLFL-SD-SSSESK---KRAFLPGSGAINDS

CgVps5 : T-VG---T-----QPEFVETRR---LOLQTMRLRRFANDSDLQDEHFFHFL-SD-BAEDSK---RVSYETGSGNANNND

EgVps5 : K-VG---R-----KQDFIENRR---FQMERMLQRTAQAAALQNDQDFLFL-SD-IVQDSK---EREQATGSGRASSDS

SpVps5 : V-VG---R-----DDEFIEQRR---AALFVMLRKISAHFVLRDDYSFKLFLE-AET-SDPRMT---HRTTLESSSSSPLR

YKR078W : -----460-----\*-----480-----\*-----500-----\*-----520-----\*-----540

ScVps5 : NDLSVVRISIEIQLLGAEDAAEVLKNG-----GDAESHKGEMISSESLPKYNBADEFFLEKKQKIDELDNLKK-----

CgVps5 : NDISEVHISEIQLLGPPEGAFVIKNG-----GLDSEYKKGFMNISSESSPKYNBPKKFFVDELDRITDLNQLKK-----

EgVps5 : NDLSIEIHLSELTLGLPDDAESVIRNG-----GLDSTGSLFMSLSSSVPKYTPPTTFIMEKRQHTDVMEELQRO-----

SpVps5 : SGPSTGTS-----GLDSTGSLFMSLSSSVPKYTPPTTFIMEKRQHTDVMEELQRO-----

YKR078W : -----\*-----560-----\*-----580-----\*-----600-----\*-----620-----\*

ScVps5 : -----LSKSLFMDTSRNTLAATEEFSSMVETLASINWSEPNSELNNFADVHKSTKSSLSRSLQETL

CgVps5 : -----MLKAVESIEEORRELSYTYDLASLESGLADVTGKSTKCYELAEQTQKRVKESLERDALQEA

EgVps5 : -----MYKSLFMDTSOKNELVSVIKEFAATINSLVELEASKRISLSLNFAEVHLRIMESLQRTSLQDSL

SpVps5 : -----VYHALLSIDORTQFASAIHDEGEAVGNLSLVDEPTLSSKFDGLSLQVELRFVQERKVAQDNL

YKR078W : -----640-----\*-----660-----\*-----680-----\*-----700-----\*-----720

ScVps5 : TMGVMLDDVIRSLASVKALENQSKL-GYFLVVIENDNNKHSQGLKQGNHSE---KFREMKEQTERRYNLTKKQQAQVGDKI

CgVps5 : TMCATLDEYVRSLSRSEFYORAKL-GYYLVIVENDFQKKQDVEKCHNNKQPANKE--RFLAARDSVKNTERRAITVKKAMHDIQEKI

EgVps5 : TLGVTIDEYLRSLGSIKAVENQRAKL-GYYLVIVENDHKKQAHQKTTSGKSP--TD-RAAAAKQLANLQRRHKTQKHWEHIAETL

SpVps5 : TLGVTIDEYVIRYVESAKNAETTRQKL-WQTWQSSVQAASRAKQLEKCKKQAKSQ--QK-SLPYLEEVEKYRAKAADKEKFESESTTL

YKR078W : -----\*-----740-----\*-----760

ScVps5 : KDFQGESDKTREFRNGVEISFEAIESCKECIELWETFYQTNL---

CgVps5 : KKEVSSFRSKMEEFNQMIEITHESAIESCKECIELWETFYQTNL---

EgVps5 : RDELAAVSEAKITDFRNMLEIYLSAIEQKECIELWETFYQTNL---

SpVps5 : KRDLSSLTSTRVDDLRASVETWLESALIESCKECIELWESFLQD---

## Supplemental Figure 2

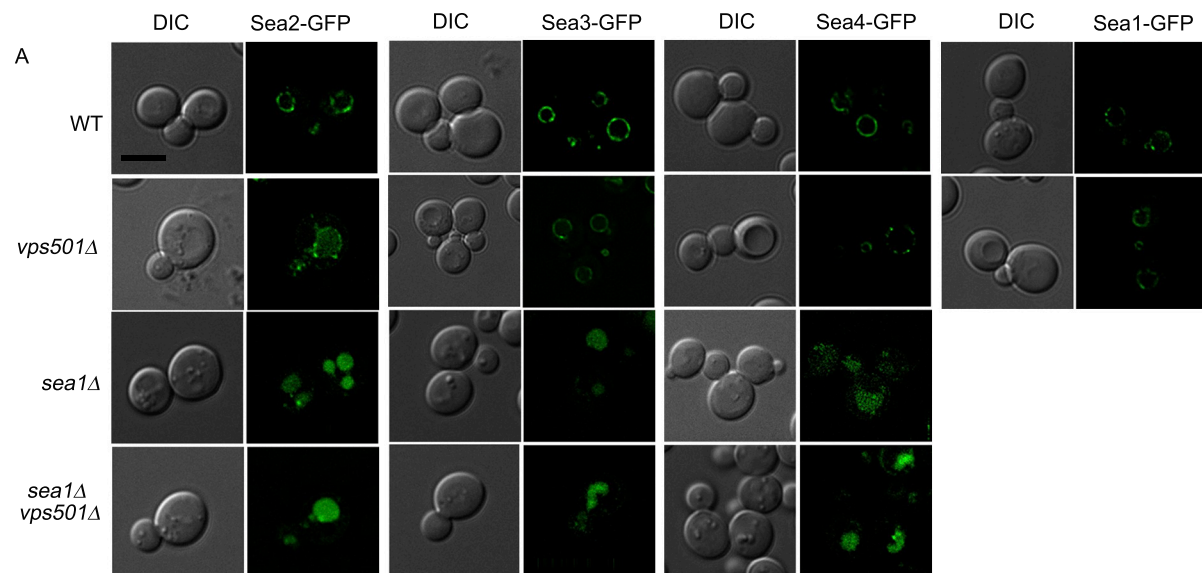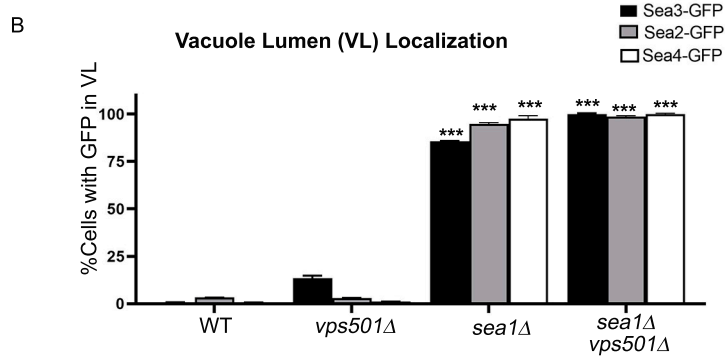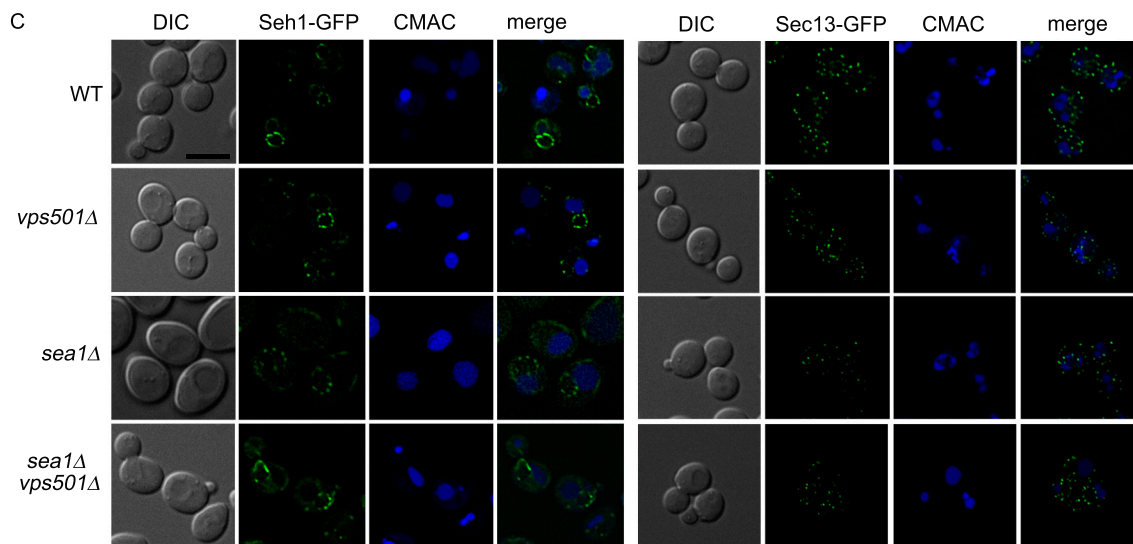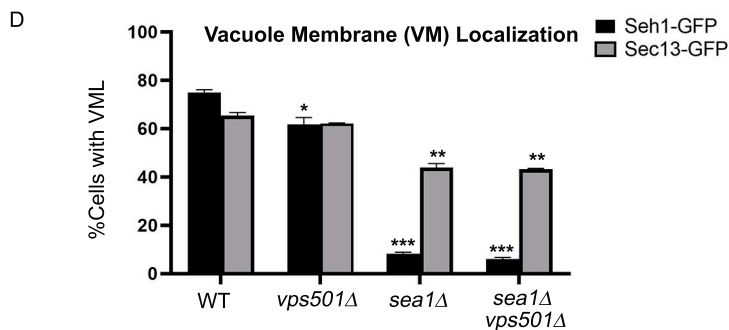

### Supplemental Figure 3

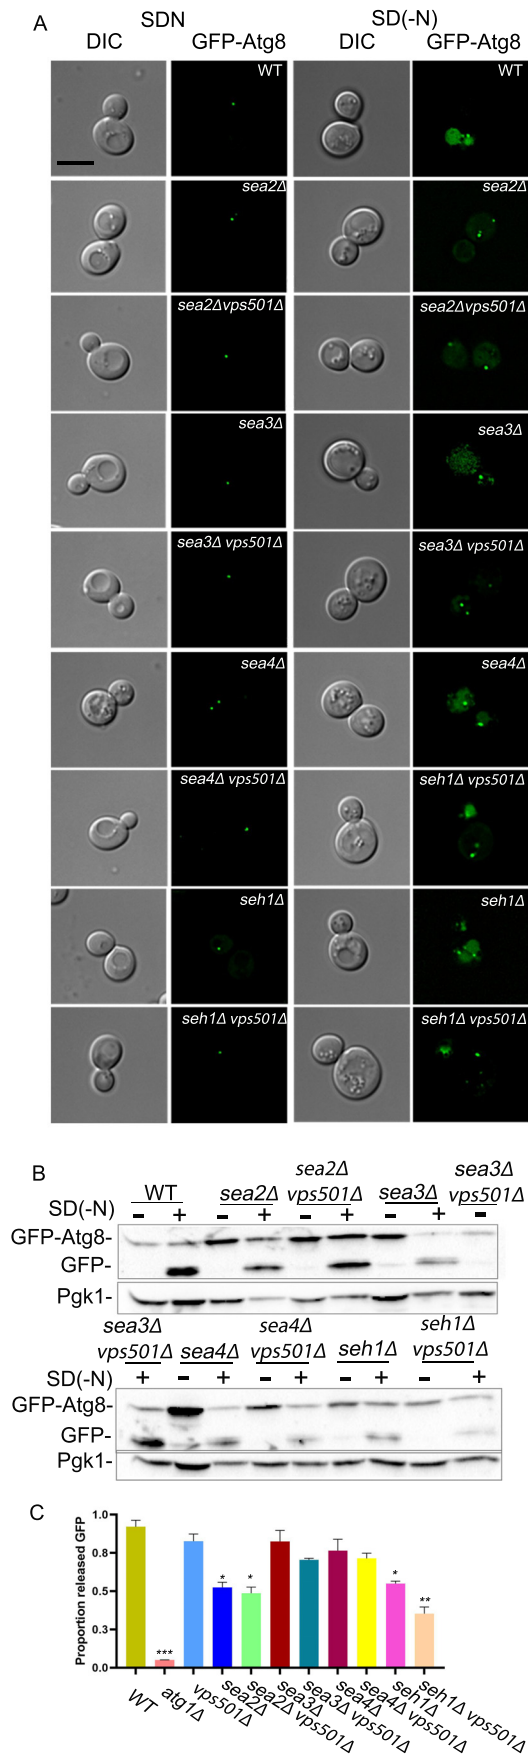

Source: http://biorxiv.org/content/10.1101/2021.05.06.441257v1.full.pdf
